# Supplementary material
Source: PubMed Central journal article supplement (PMC3156557)

**Supplemental Table 1. Distribution of Labeled Cells in V1 Layer 2/3 Following Tracer Injections in V2**

|                                   | Patches   |            | Interpatches |            |            |            | Total         | % Interpatch |
|-----------------------------------|-----------|------------|--------------|------------|------------|------------|---------------|--------------|
|                                   | Zone 1    | Zone 2     | Zone 3       | Zone 4     | Zone 5     | Zone 6     |               |              |
| <b>Thick Stripe</b>               |           |            |              |            |            |            |               |              |
| <i>Injection 1</i> (Fig.1,2)      | 376 (4%)  | 944 (9%)   | 1376 (14%)   | 1795 (18%) | 2423 (24%) | 3066 (31%) | 9980          | 87%          |
| <i>Injection 2</i> (Fig.4,5)      | 77 (2%)   | 523 (11%)  | 955 (19%)    | 1249 (25%) | 1158 (24%) | 958 (19%)  | 4920          | 87%          |
| <i>Injection 3</i> (Fig.S1)       | 184 (12%) | 229 (15%)  | 247 (16%)    | 275 (17%)  | 325 (21%)  | 319 (20%)  | 1579          | 74%          |
| <i>Injection 4</i> (Fig.S2)       | 99 (2%)   | 231 (4%)   | 600 (10%)    | 1199 (20%) | 1704 (28%) | 2153 (36%) | 5986          | 94%          |
| <i>Injection 5</i> (Fig.S3)       | 25 (2%)   | 197 (15%)  | 359 (27%)    | 347 (26%)  | 296 (22%)  | 107 (8%)   | 1331          | 83%          |
| <i>Injection 6</i> (Fig.S4)       | 131 (5%)  | 344 (13%)  | 490 (18%)    | 564 (21%)  | 601 (23%)  | 540 (20%)  | 2670          | 82%          |
| <i>Injection 7</i> (Fig.S5)       | 143 (5%)  | 291 (12%)  | 404 (16%)    | 586 (22%)  | 621 (24%)  | 560 (21%)  | 2605          | 83%          |
| <i>Injection 8</i> (Fig.S6)       | 58 (4%)   | 145 (11%)  | 247 (18%)    | 278 (20%)  | 310 (23%)  | 332 (24%)  | 1370          | 85%          |
| <b>Mean Percentage</b>            | <b>5%</b> | <b>11%</b> | <b>17%</b>   | <b>21%</b> | <b>24%</b> | <b>22%</b> | <b>30,441</b> | <b>84%</b>   |
| <b>Pale Stripe</b>                |           |            |              |            |            |            |               |              |
| <i>Injection 9</i> (Fig.6,7)      | 755 (8%)  | 1285 (14%) | 1746 (19%)   | 1808 (20%) | 1994 (22%) | 1615 (17%) | 9203          | 78%          |
| <i>Injection 10</i> (Fig.9,10,11) | 515 (9%)  | 739 (12%)  | 945 (16%)    | 1171 (20%) | 1191 (20%) | 1364 (23%) | 5925          | 79%          |
| <i>Injection 11</i> (Fig.S7)      | 189 (4%)  | 474 (9%)   | 872 (16%)    | 1301 (24%) | 1317 (25%) | 1171 (22%) | 5324          | 87%          |
| <i>Injection 12</i> (Fig.S8)      | 244 (8%)  | 499 (15%)  | 621 (19%)    | 720 (23%)  | 654 (20%)  | 497 (15%)  | 3235          | 77%          |
| <i>Injection 13</i> (Fig.S9)      | 66 (2%)   | 248 (8%)   | 402 (13%)    | 535 (17%)  | 708 (22%)  | 1218 (38%) | 3177          | 90%          |
| <i>Injection 14</i> (Fig.S10)     | 47 (1%)   | 272 (9%)   | 532 (16%)    | 775 (24%)  | 903 (28%)  | 714 (22%)  | 3243          | 90%          |
| <i>Injection 15</i> (Fig.S11)     | 28 (4%)   | 88 (12%)   | 131 (18%)    | 151 (21%)  | 201 (28%)  | 127 (17%)  | 726           | 84%          |
| <i>Injection 16</i> (Fig.S12)     | 394 (4%)  | 1008 (11%) | 1541 (17%)   | 1756 (19%) | 2137 (23%) | 2361 (16%) | 9197          | 85%          |
| <b>Mean Percentage</b>            | <b>5%</b> | <b>11%</b> | <b>17%</b>   | <b>21%</b> | <b>24%</b> | <b>23%</b> | <b>40,030</b> | <b>84%</b>   |

**Supplemental Table 2. Distribution of Labeled Cells in V1 Layer 4B Following Tracer Injections in V2**

|                                 | Patches    |            | Interpatches |            |            |            | Total         | % Interpatch |
|---------------------------------|------------|------------|--------------|------------|------------|------------|---------------|--------------|
|                                 | Zone 1     | Zone 2     | Zone 3       | Zone 4     | Zone 5     | Zone 6     |               |              |
| <b>Thick Stripe</b>             |            |            |              |            |            |            |               |              |
| <i>Injection 1</i> (Fig.1,3)    | 860 (12%)  | 1106 (16%) | 1010 (15%)   | 1128 (16%) | 1286 (19%) | 1554 (22%) | 6944          | 72%          |
| <i>Injection 2</i>              | 64 (6%)    | 187 (18%)  | 285 (27%)    | 239 (22%)  | 177 (17%)  | 105 (10%)  | 1057          | 76%          |
| <i>Injection 3</i> (Fig.S1)     | 126 (5%)   | 320 (14%)  | 398 (17%)    | 481 (20%)  | 539 (23%)  | 500 (21%)  | 2364          | 81%          |
| <i>Injection 4</i> (Fig.S2)     | 110 (8%)   | 154 (12%)  | 219 (17%)    | 186 (14%)  | 260 (21%)  | 370 (28%)  | 1299          | 80%          |
| <i>Injection 5</i> (Fig.S3)     | 360 (17%)  | 447 (21%)  | 410 (19%)    | 386 (18%)  | 305 (14%)  | 245 (11%)  | 2153          | 63%          |
| <i>Injection 6</i> (Fig.S4)     | 144 (8%)   | 272 (16%)  | 297 (18%)    | 313 (18%)  | 355 (20%)  | 356 (20%)  | 1737          | 76%          |
| <i>Injection 7</i> (Fig.S5)     | 196 (8%)   | 398 (16%)  | 384 (15%)    | 456 (18%)  | 492 (19%)  | 621 (24%)  | 2547          | 76%          |
| <i>Injection 8</i> (Fig.S6)     | 80 (8%)    | 124 (13%)  | 186 (19%)    | 163 (17%)  | 197 (20%)  | 229 (23%)  | 979           | 79%          |
| <b>Mean Percentage</b>          | <b>9%</b>  | <b>16%</b> | <b>18%</b>   | <b>18%</b> | <b>19%</b> | <b>20%</b> | <b>19,080</b> | <b>75%</b>   |
| <b>Pale Stripe</b>              |            |            |              |            |            |            |               |              |
| <i>Injection 9</i> (Fig.6,8) M* | 654 (12%)  | 883 (15%)  | 1086 (19%)   | 1012 (18%) | 1143 (20%) | 927 (16%)  | 5705          | 73%          |
| <i>Injection 10</i> L*          | 115 (11%)  | 148 (15%)  | 136 (14%)    | 178 (18%)  | 186 (19%)  | 242 (23%)  | 1005          | 74%          |
| <i>Injection 11</i> (Fig.S7) L  | 116 (12%)  | 167 (17%)  | 179 (19%)    | 188 (20%)  | 153 (16%)  | 155 (16%)  | 958           | 71%          |
| <i>Injection 12</i> (Fig.S8) M  | 139 (13%)  | 210 (19%)  | 207 (19%)    | 224 (21%)  | 192 (18%)  | 112 (10%)  | 1084          | 68%          |
| <i>Injection 13</i> (Fig.S9) M  | 51 (8%)    | 76 (13%)   | 89 (15%)     | 66 (11%)   | 119 (20%)  | 197 (33%)  | 598           | 79%          |
| <i>Injection 14</i> (Fig.S10) M | 221 (11%)  | 342 (17%)  | 392 (20%)    | 412 (21%)  | 351 (18%)  | 270 (13%)  | 1988          | 72%          |
| <i>Injection 15</i> (Fig.S11) L | 55 (12%)   | 79 (18%)   | 78 (17%)     | 77 (17%)   | 78 (17%)   | 83 (19%)   | 450           | 70%          |
| <i>Injection 16</i> (Fig.S12) M | 180 (16%)  | 187 (16%)  | 179 (16%)    | 156 (13%)  | 202 (18%)  | 236 (21%)  | 1140          | 68%          |
| <b>Mean Percentage</b>          | <b>12%</b> | <b>16%</b> | <b>17%</b>   | <b>18%</b> | <b>18%</b> | <b>19%</b> | <b>12,928</b> | <b>72%</b>   |

\* M = Pale stripe medial to a thick stripe, L = Pale stripe lateral to a thick stripe

Supplemental Figure 1. Thick stripe injection 3 before silver intensification (a1), and after silver intensification (a2). Cell labeling and CO density plots in layer 2/3 (b-e) and layer 4B (f-i).

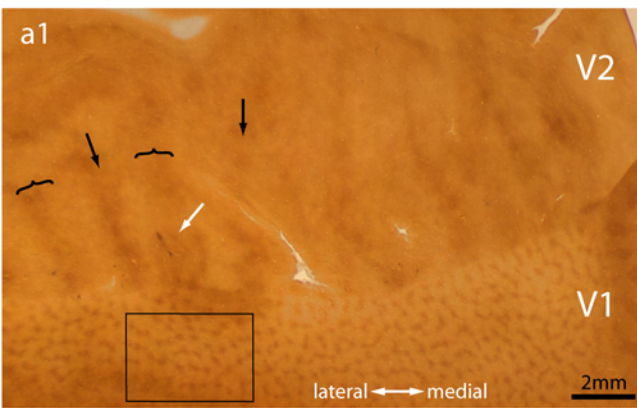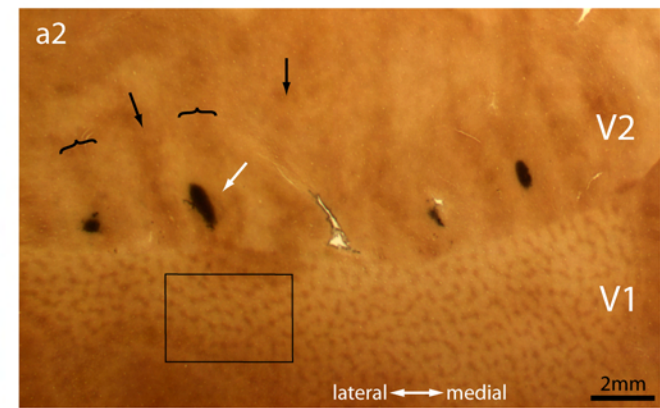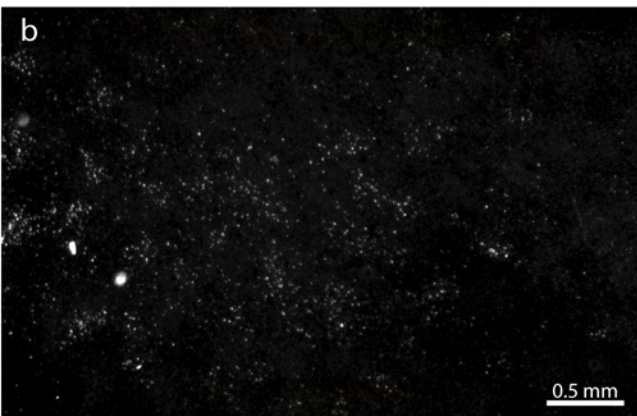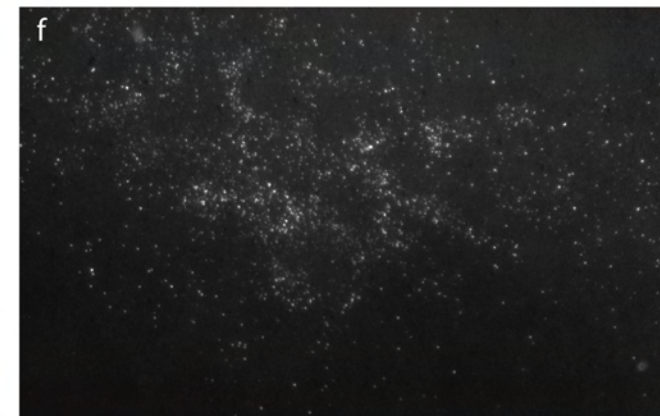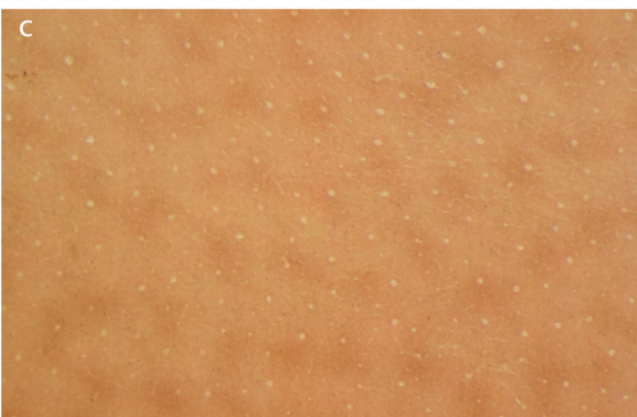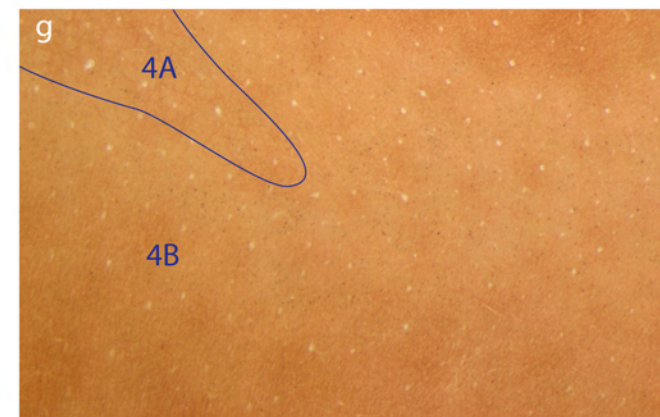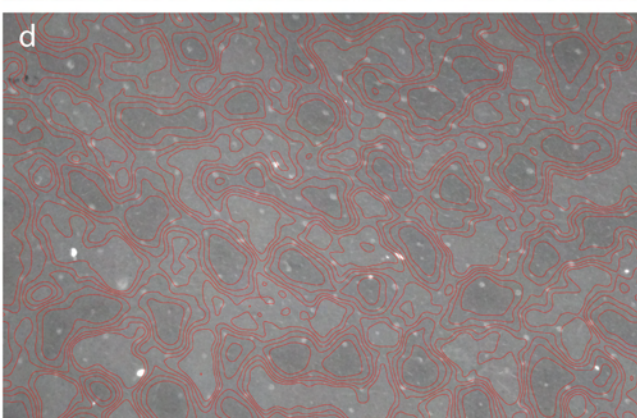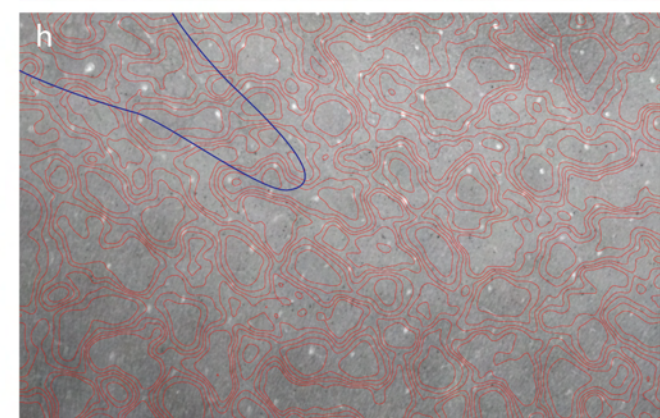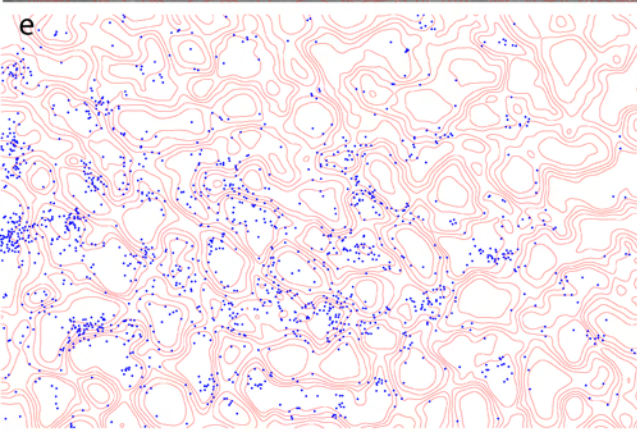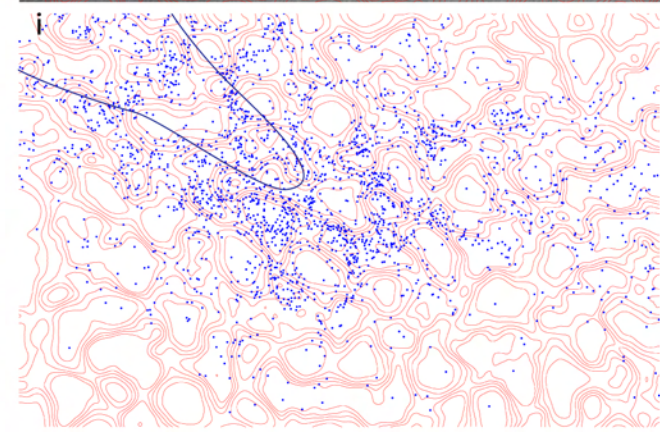

Supplemental Figure 2. Thick stripe injection 4 before silver intensification (a1), and after silver intensification (a2). Cell labeling and CO density plots in layer 2/3 (b-e) and layer 4B (f-i).

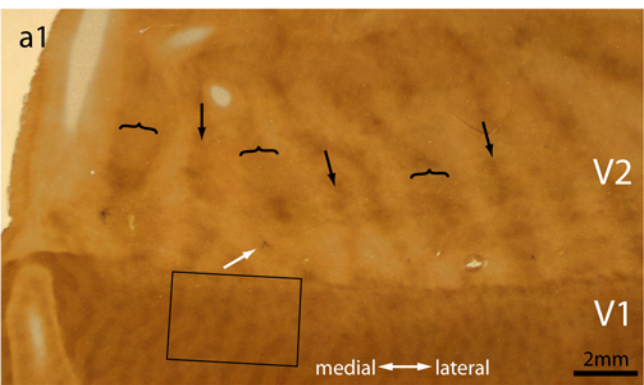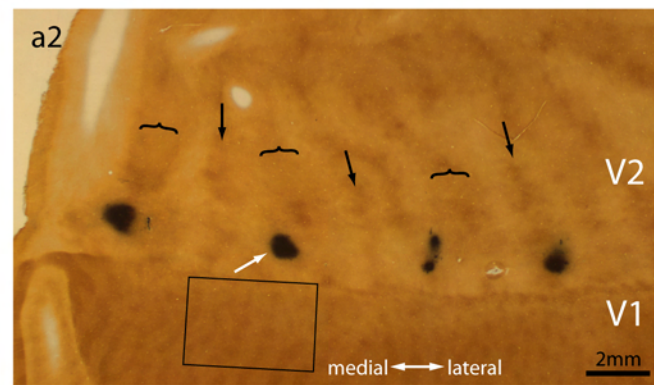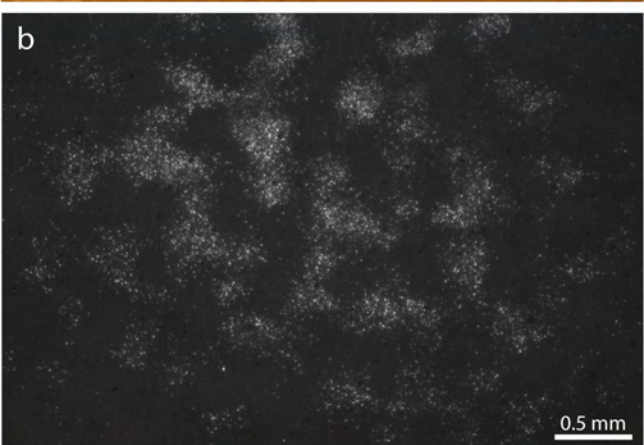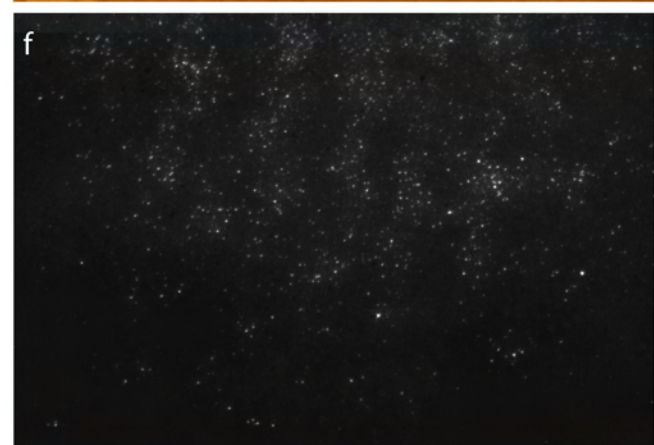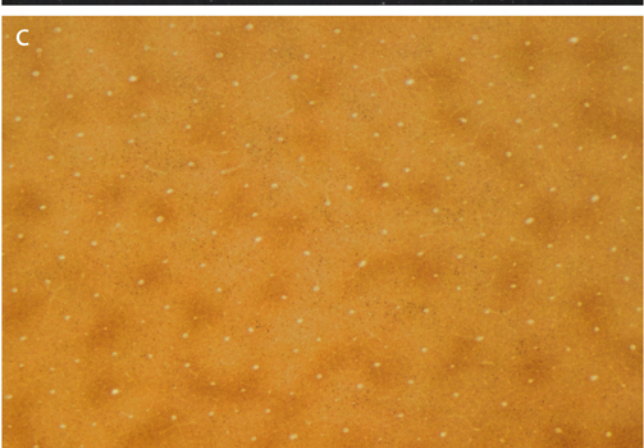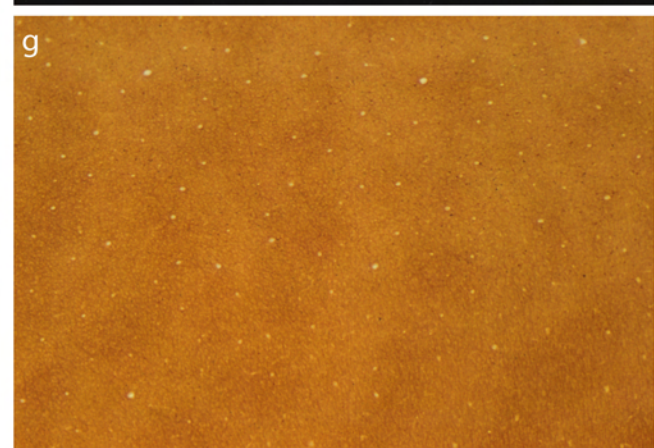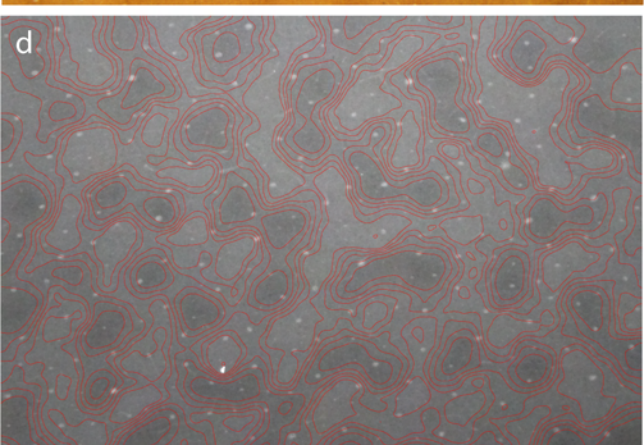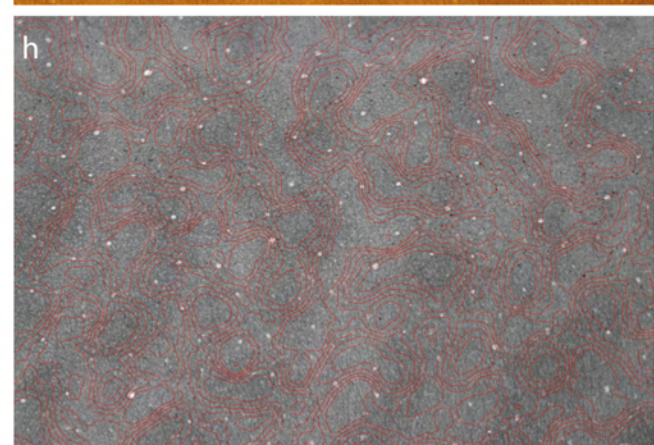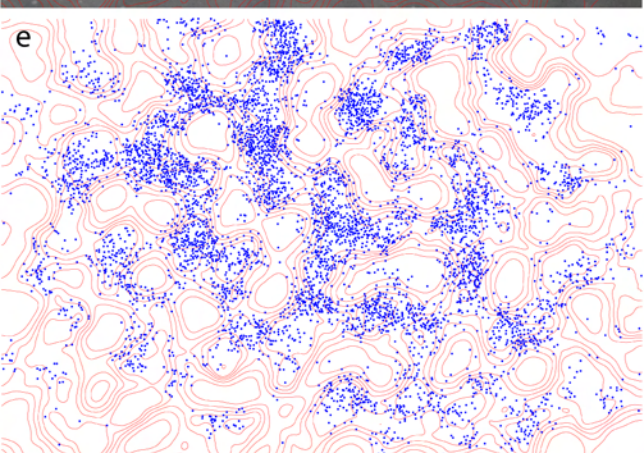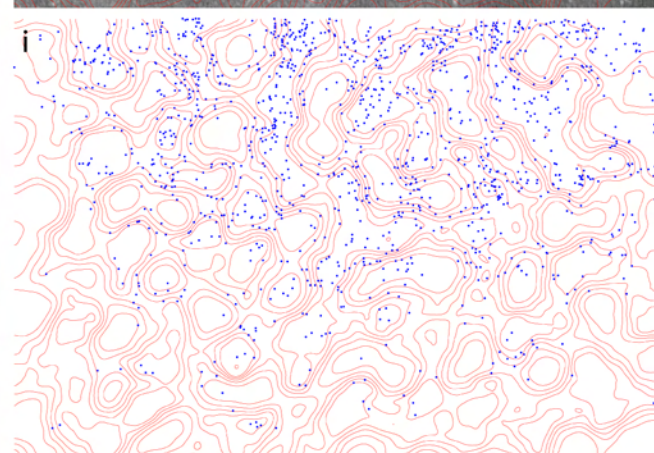

Supplemental Figure 3. Thick stripe injection 5 after silver intensification (a). Cell labeling and CO density plots in layer 2/3 (b-e) and layer 4B (f-i).

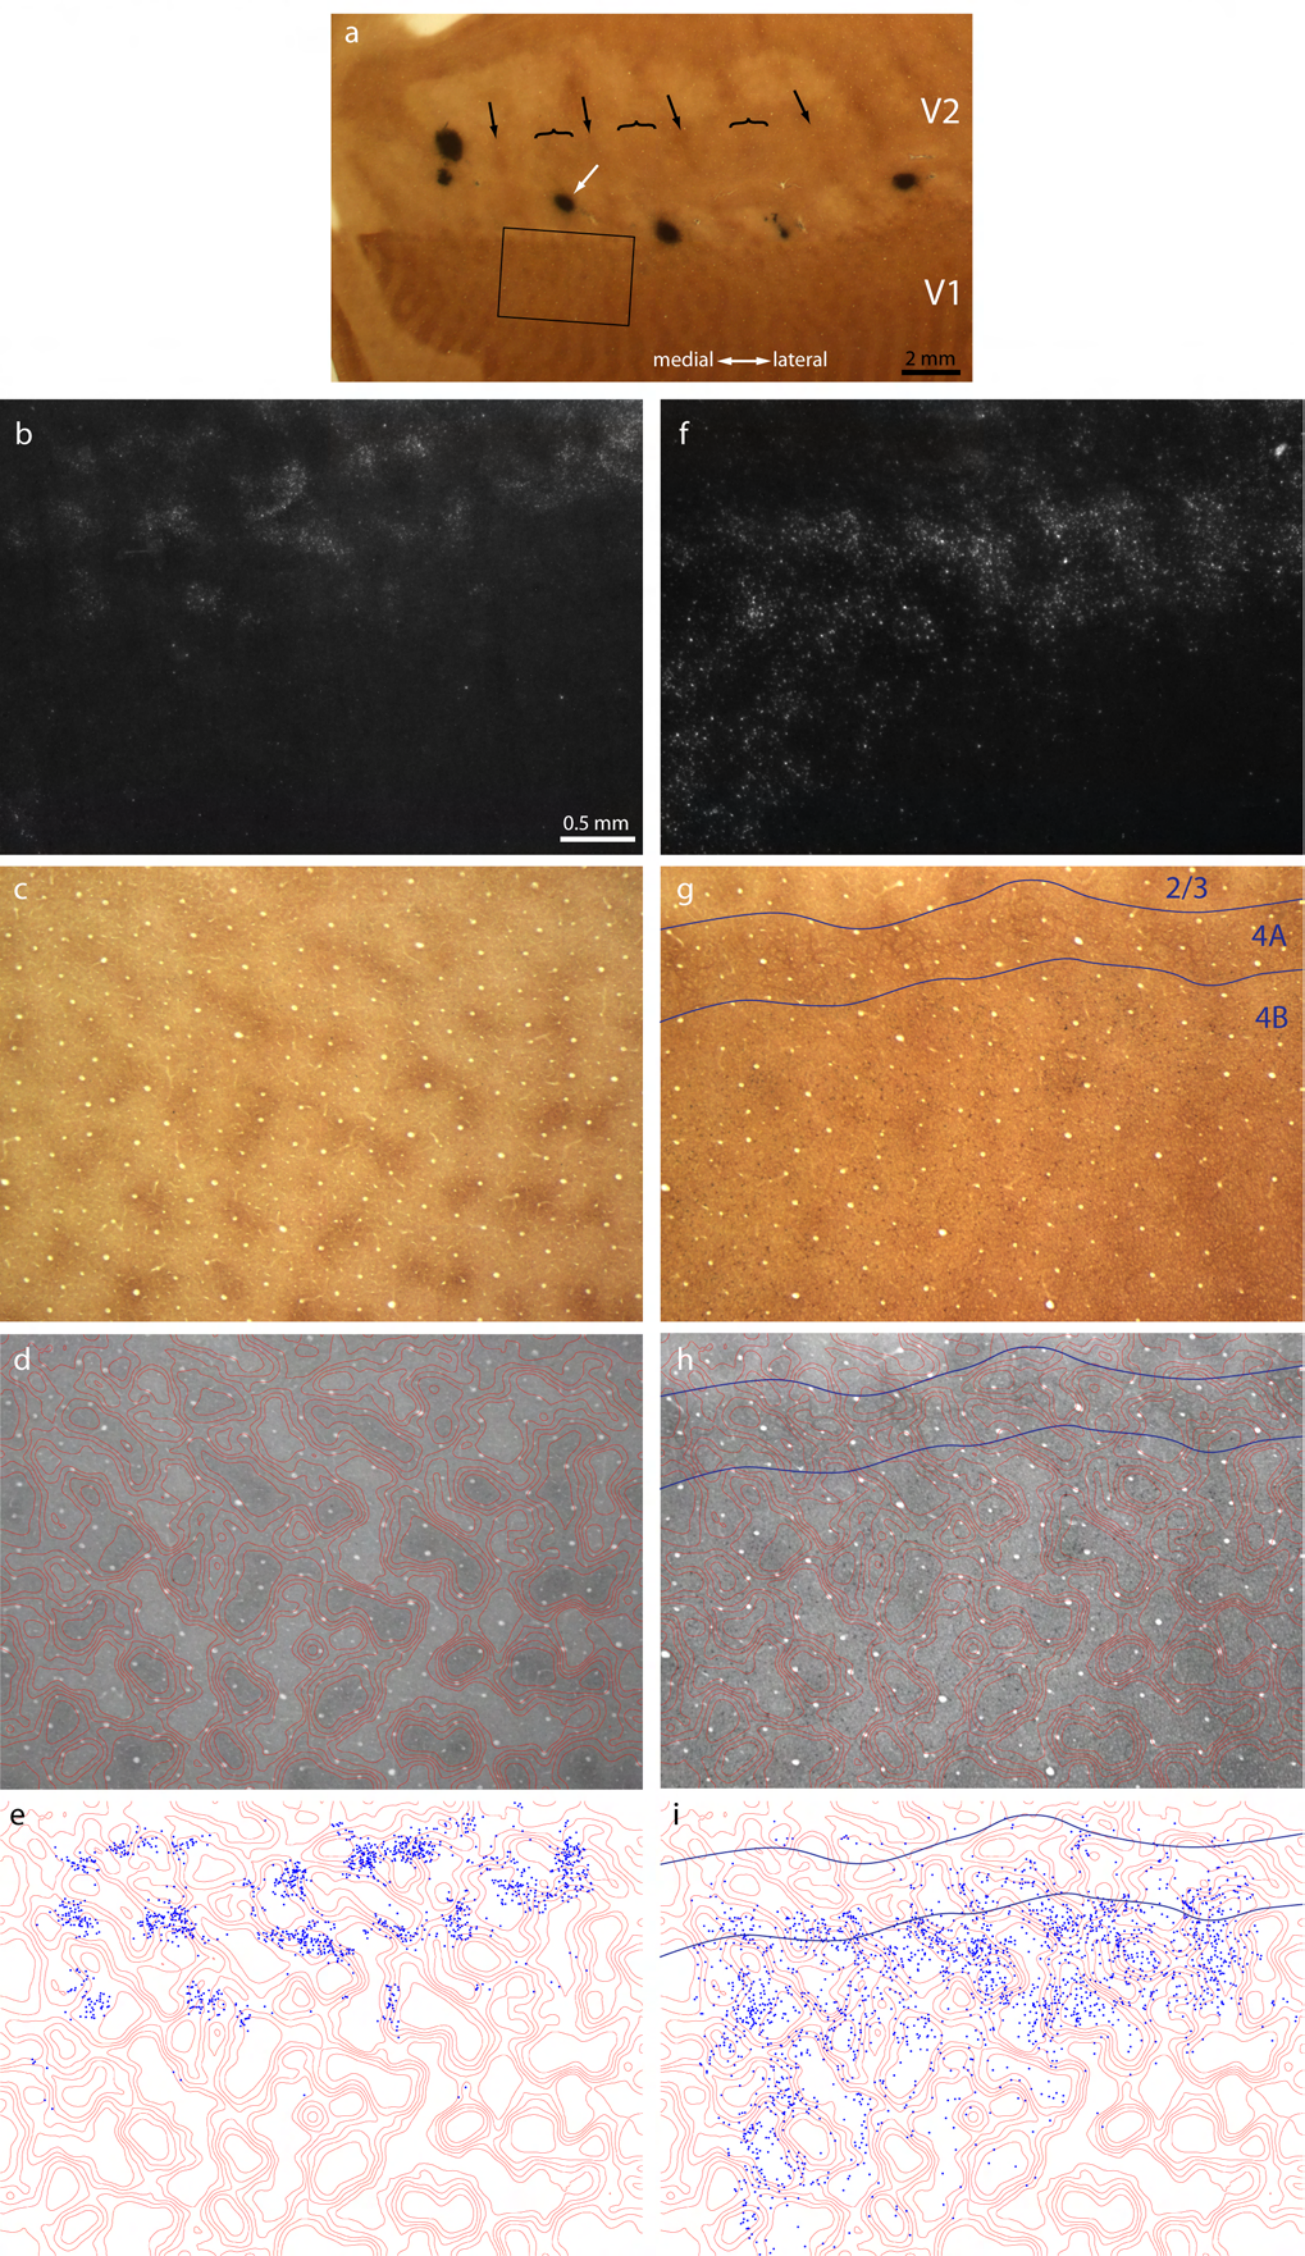

Supplemental Figure 4. Thick stripe injection 6 after silver intensification (a). Cell labeling and CO density plots in layer 2/3 (b-e) and layer 4B (f-i).

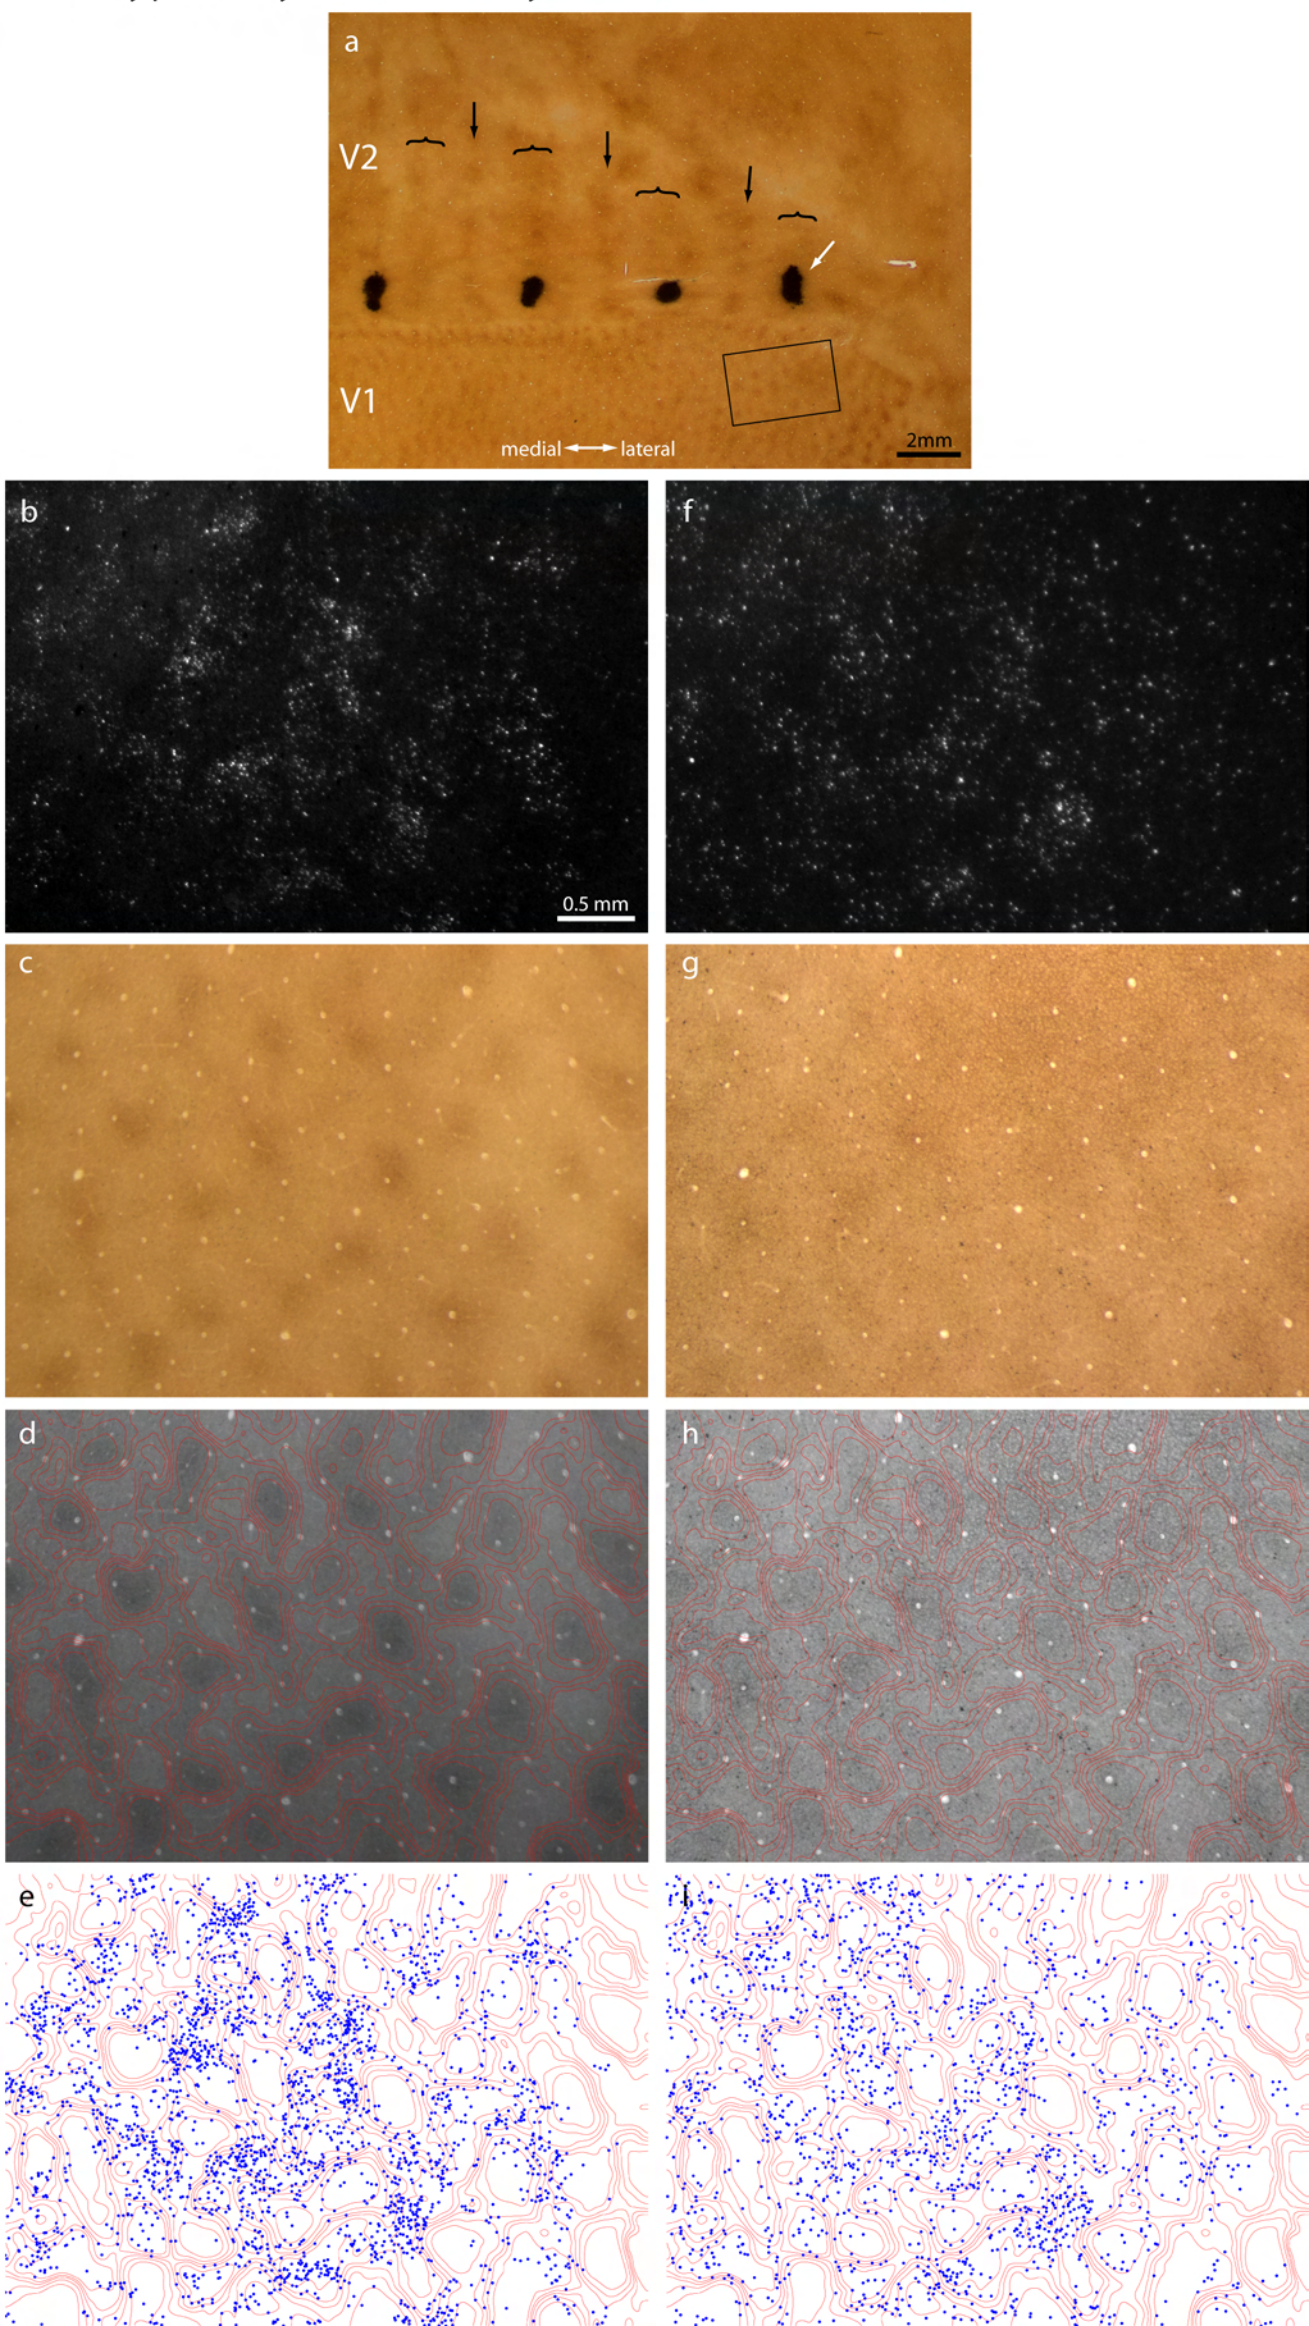

Supplemental Figure 5. Thick stripe injection 7 before silver intensification (a1), and after silver intensification (a2). Cell labeling and CO density plots in layer 2/3 (b-e) and layer 4B (f-i).

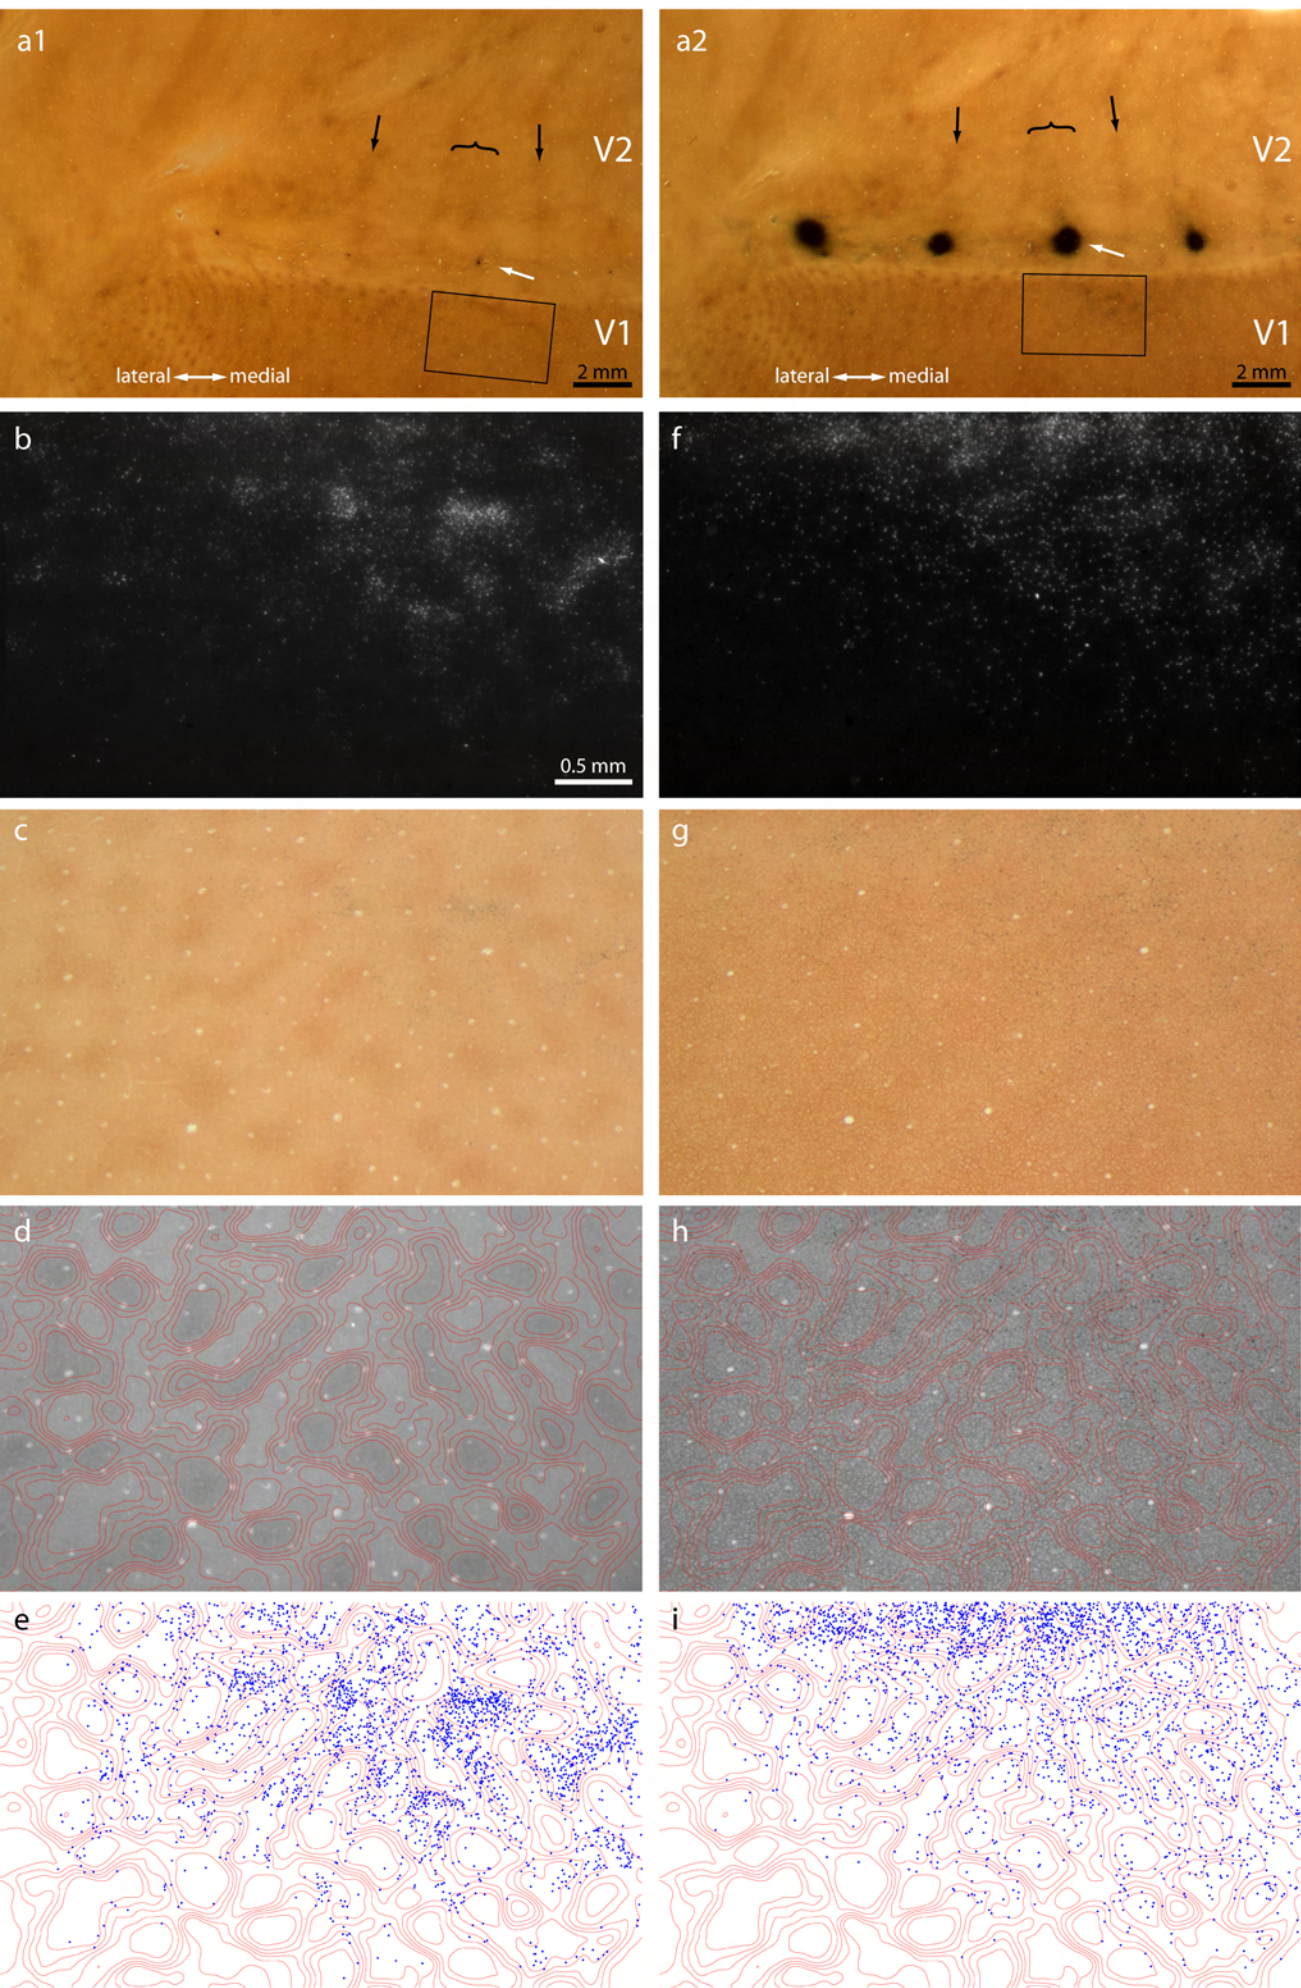

Supplemental Figure 6. Thick stripe injection 8 after silver intensification (a). Cell labeling and CO density plots in layer 2/3 (b-e) and layer 4B (f-i).

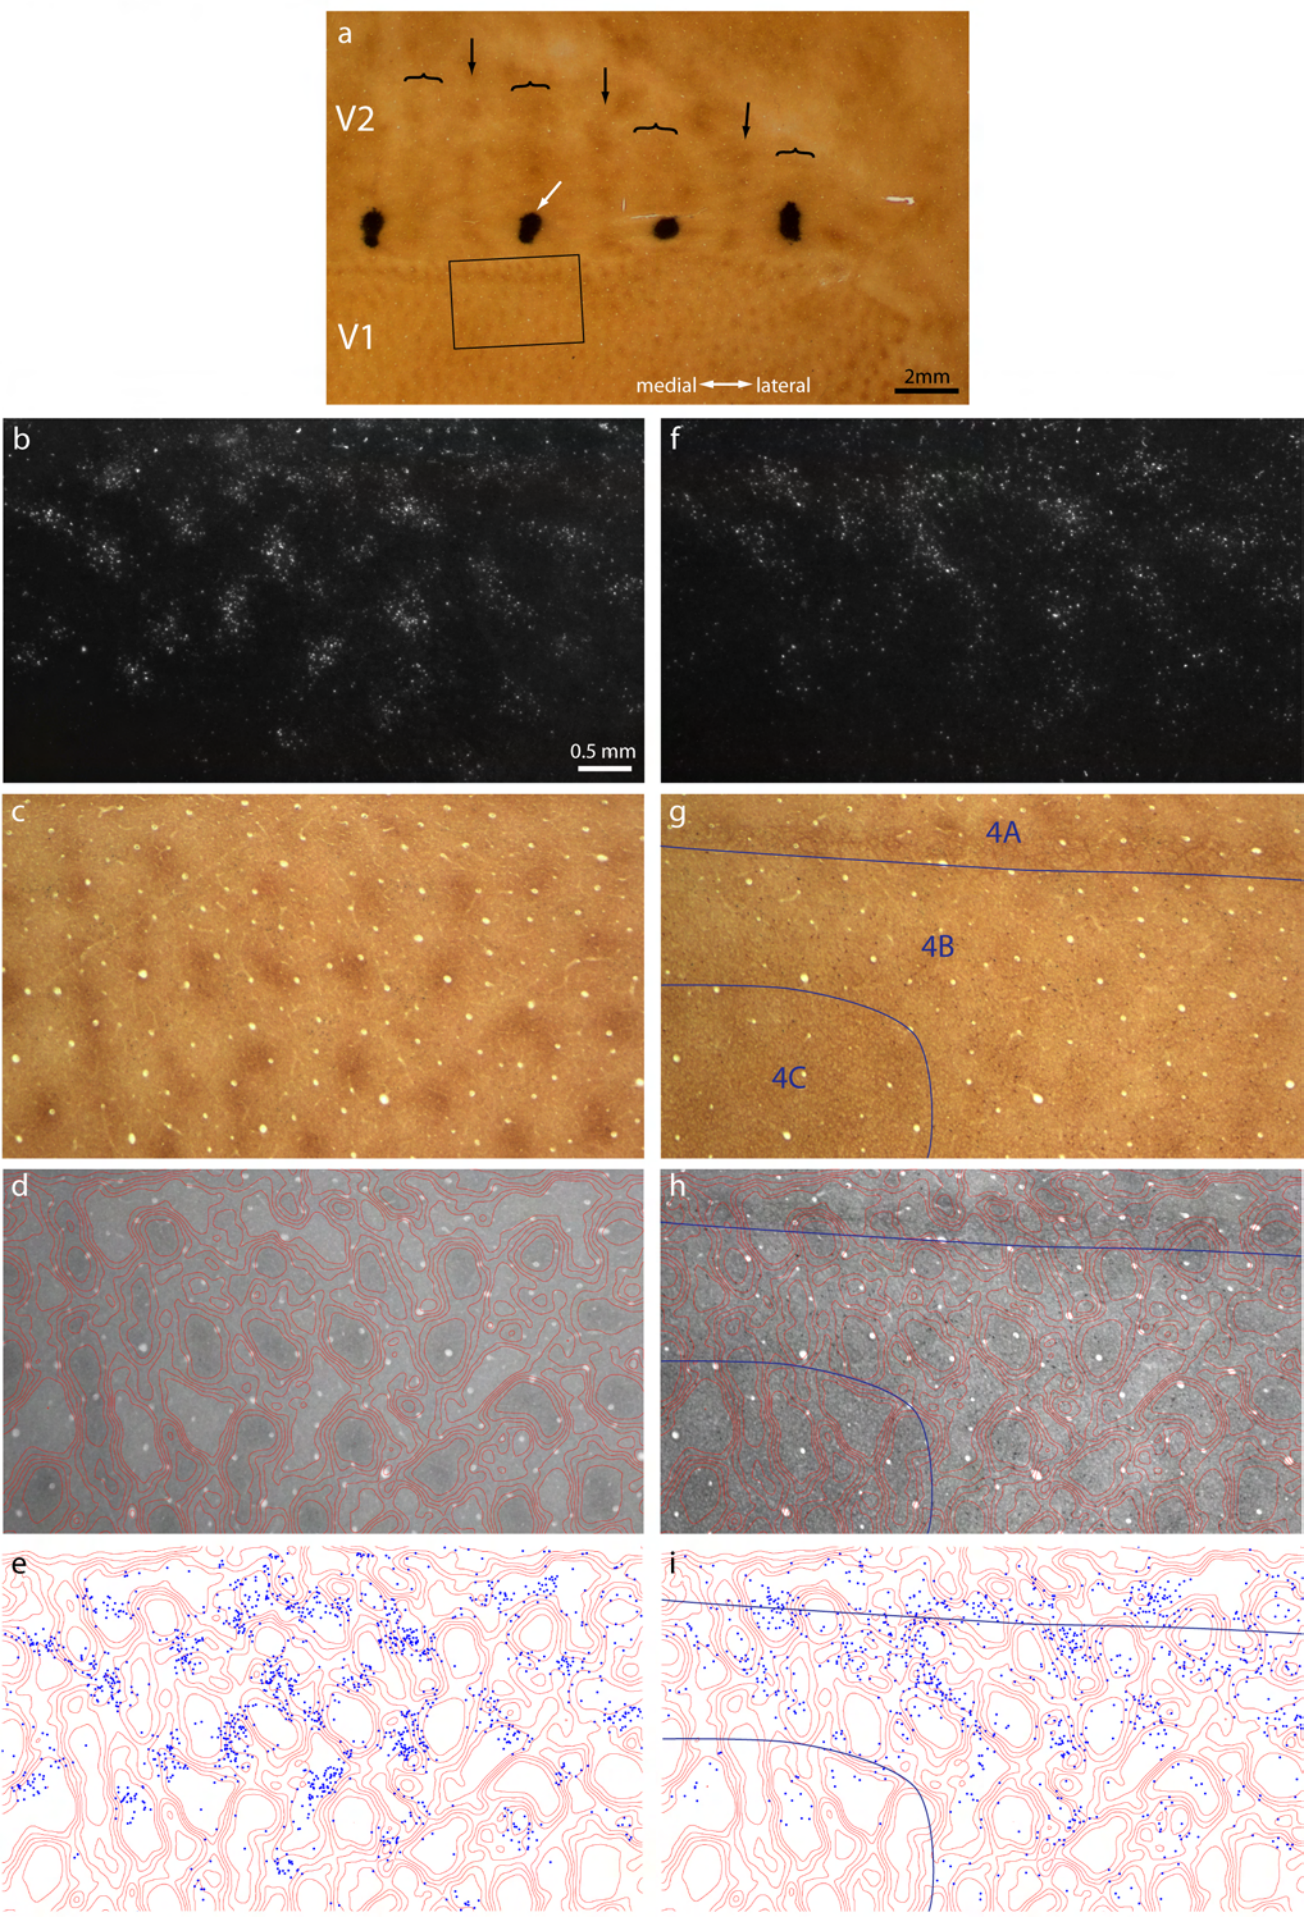



Supplemental Figure 7. Pale stripe injection 11 before silver intensification (a1), and after silver intensification (a2). Cell labeling and CO density plots in layer 2/3 (b-e) and layer 4B (f-i).

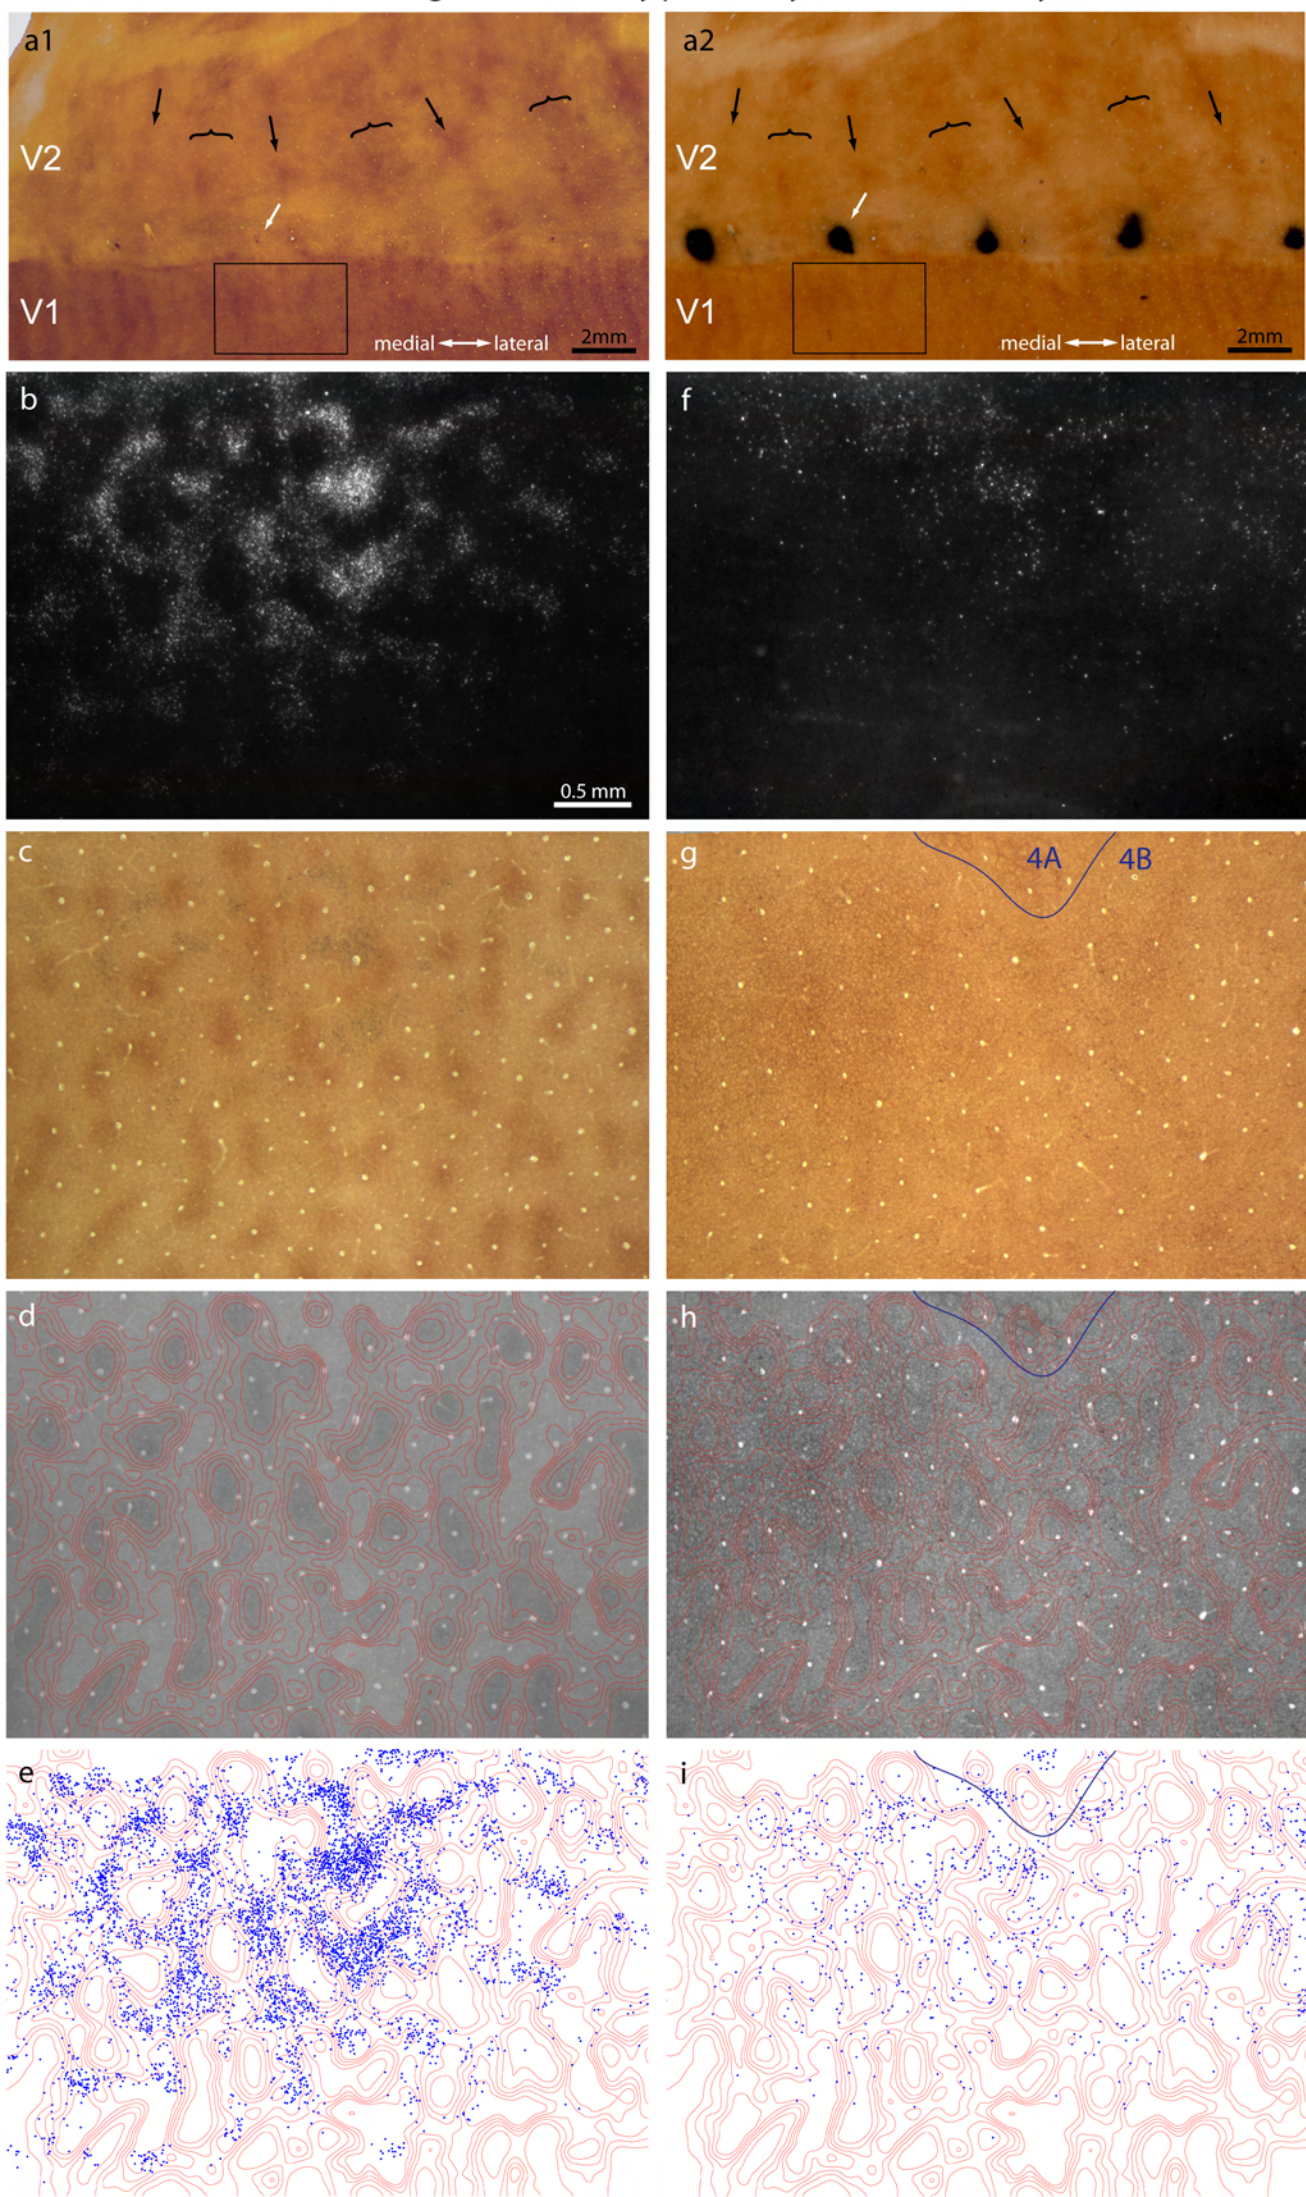

Supplemental Figure 8. Pale stripe injection 12 after silver intensification (a). Cell labeling and CO density plots in layer 2/3 (b-e) and layer 4B (f-i).

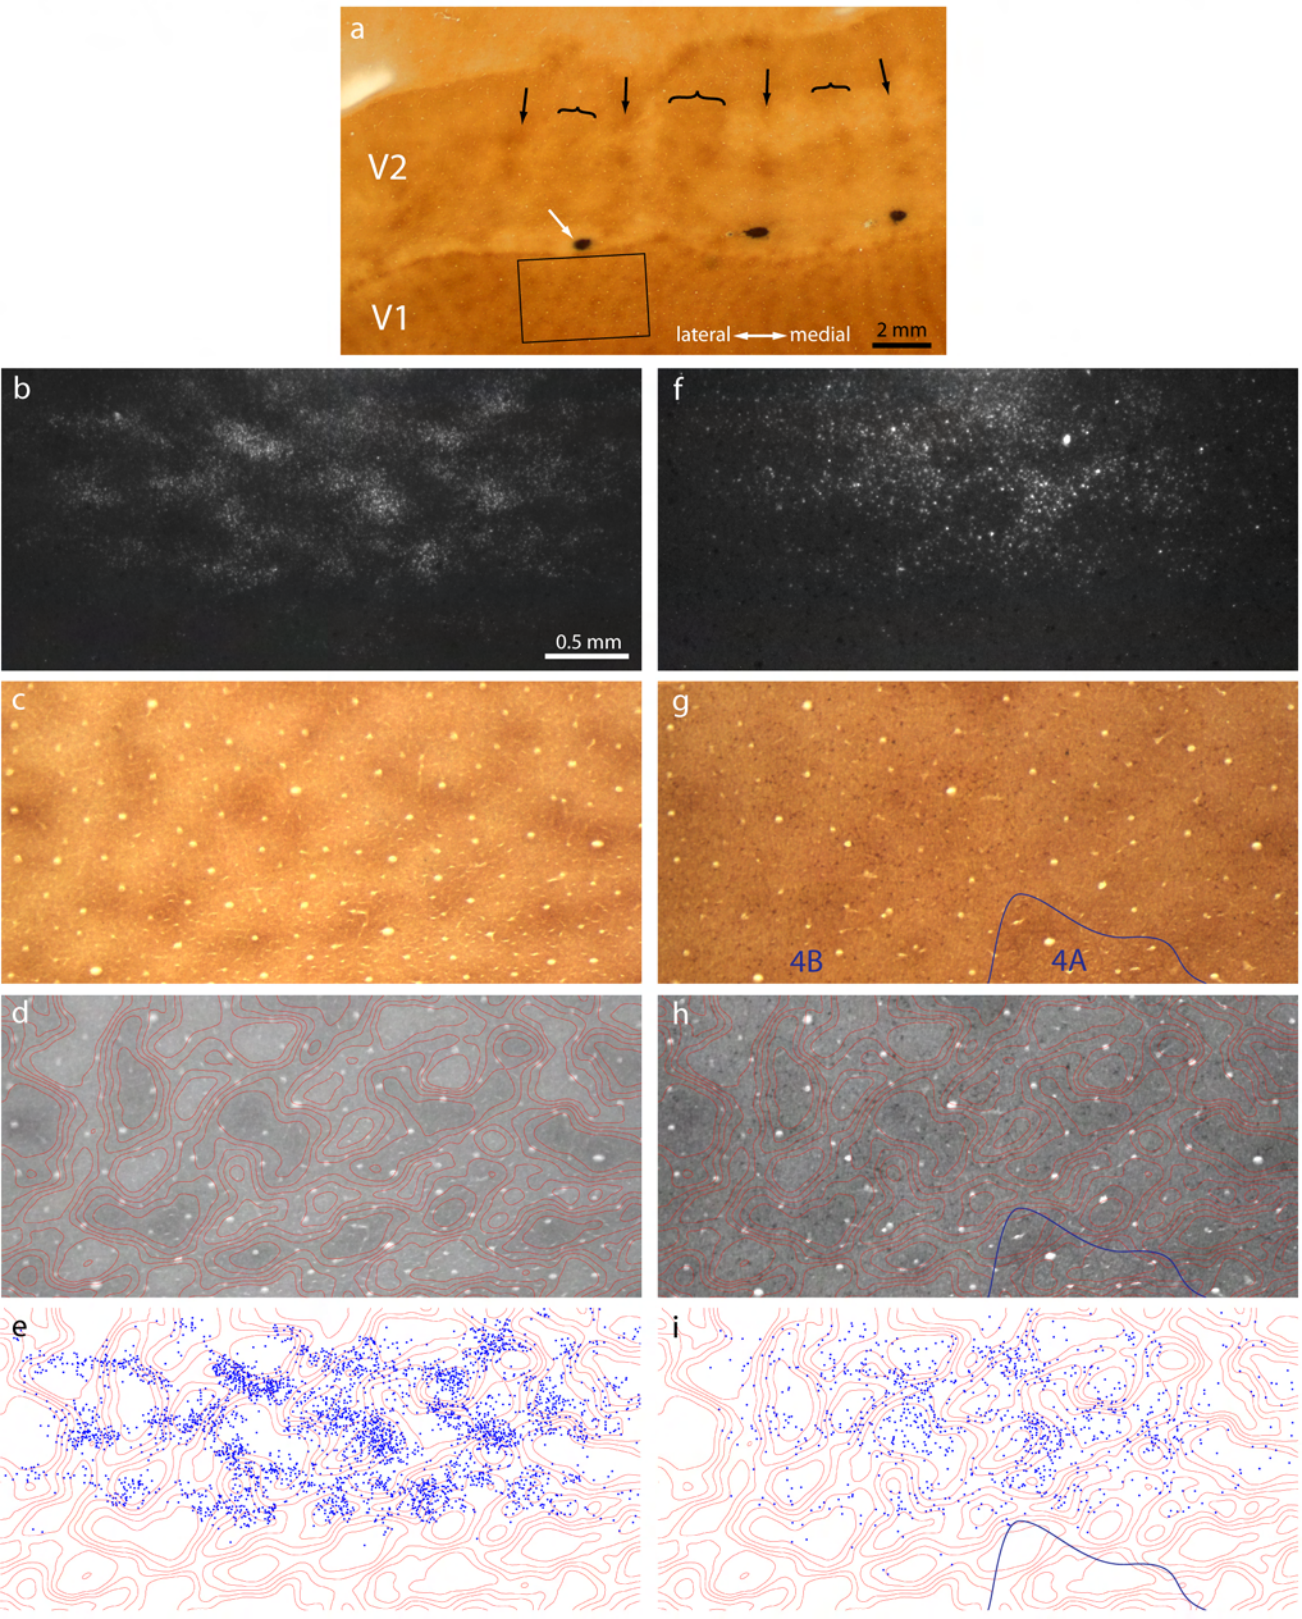

Supplemental Figure 9. Pale stripe injection 13 before silver intensification (a1), and after silver intensification (a2). Cell labeling and CO density plots in layer 2/3 (b-e) and layer 4B (f-i).

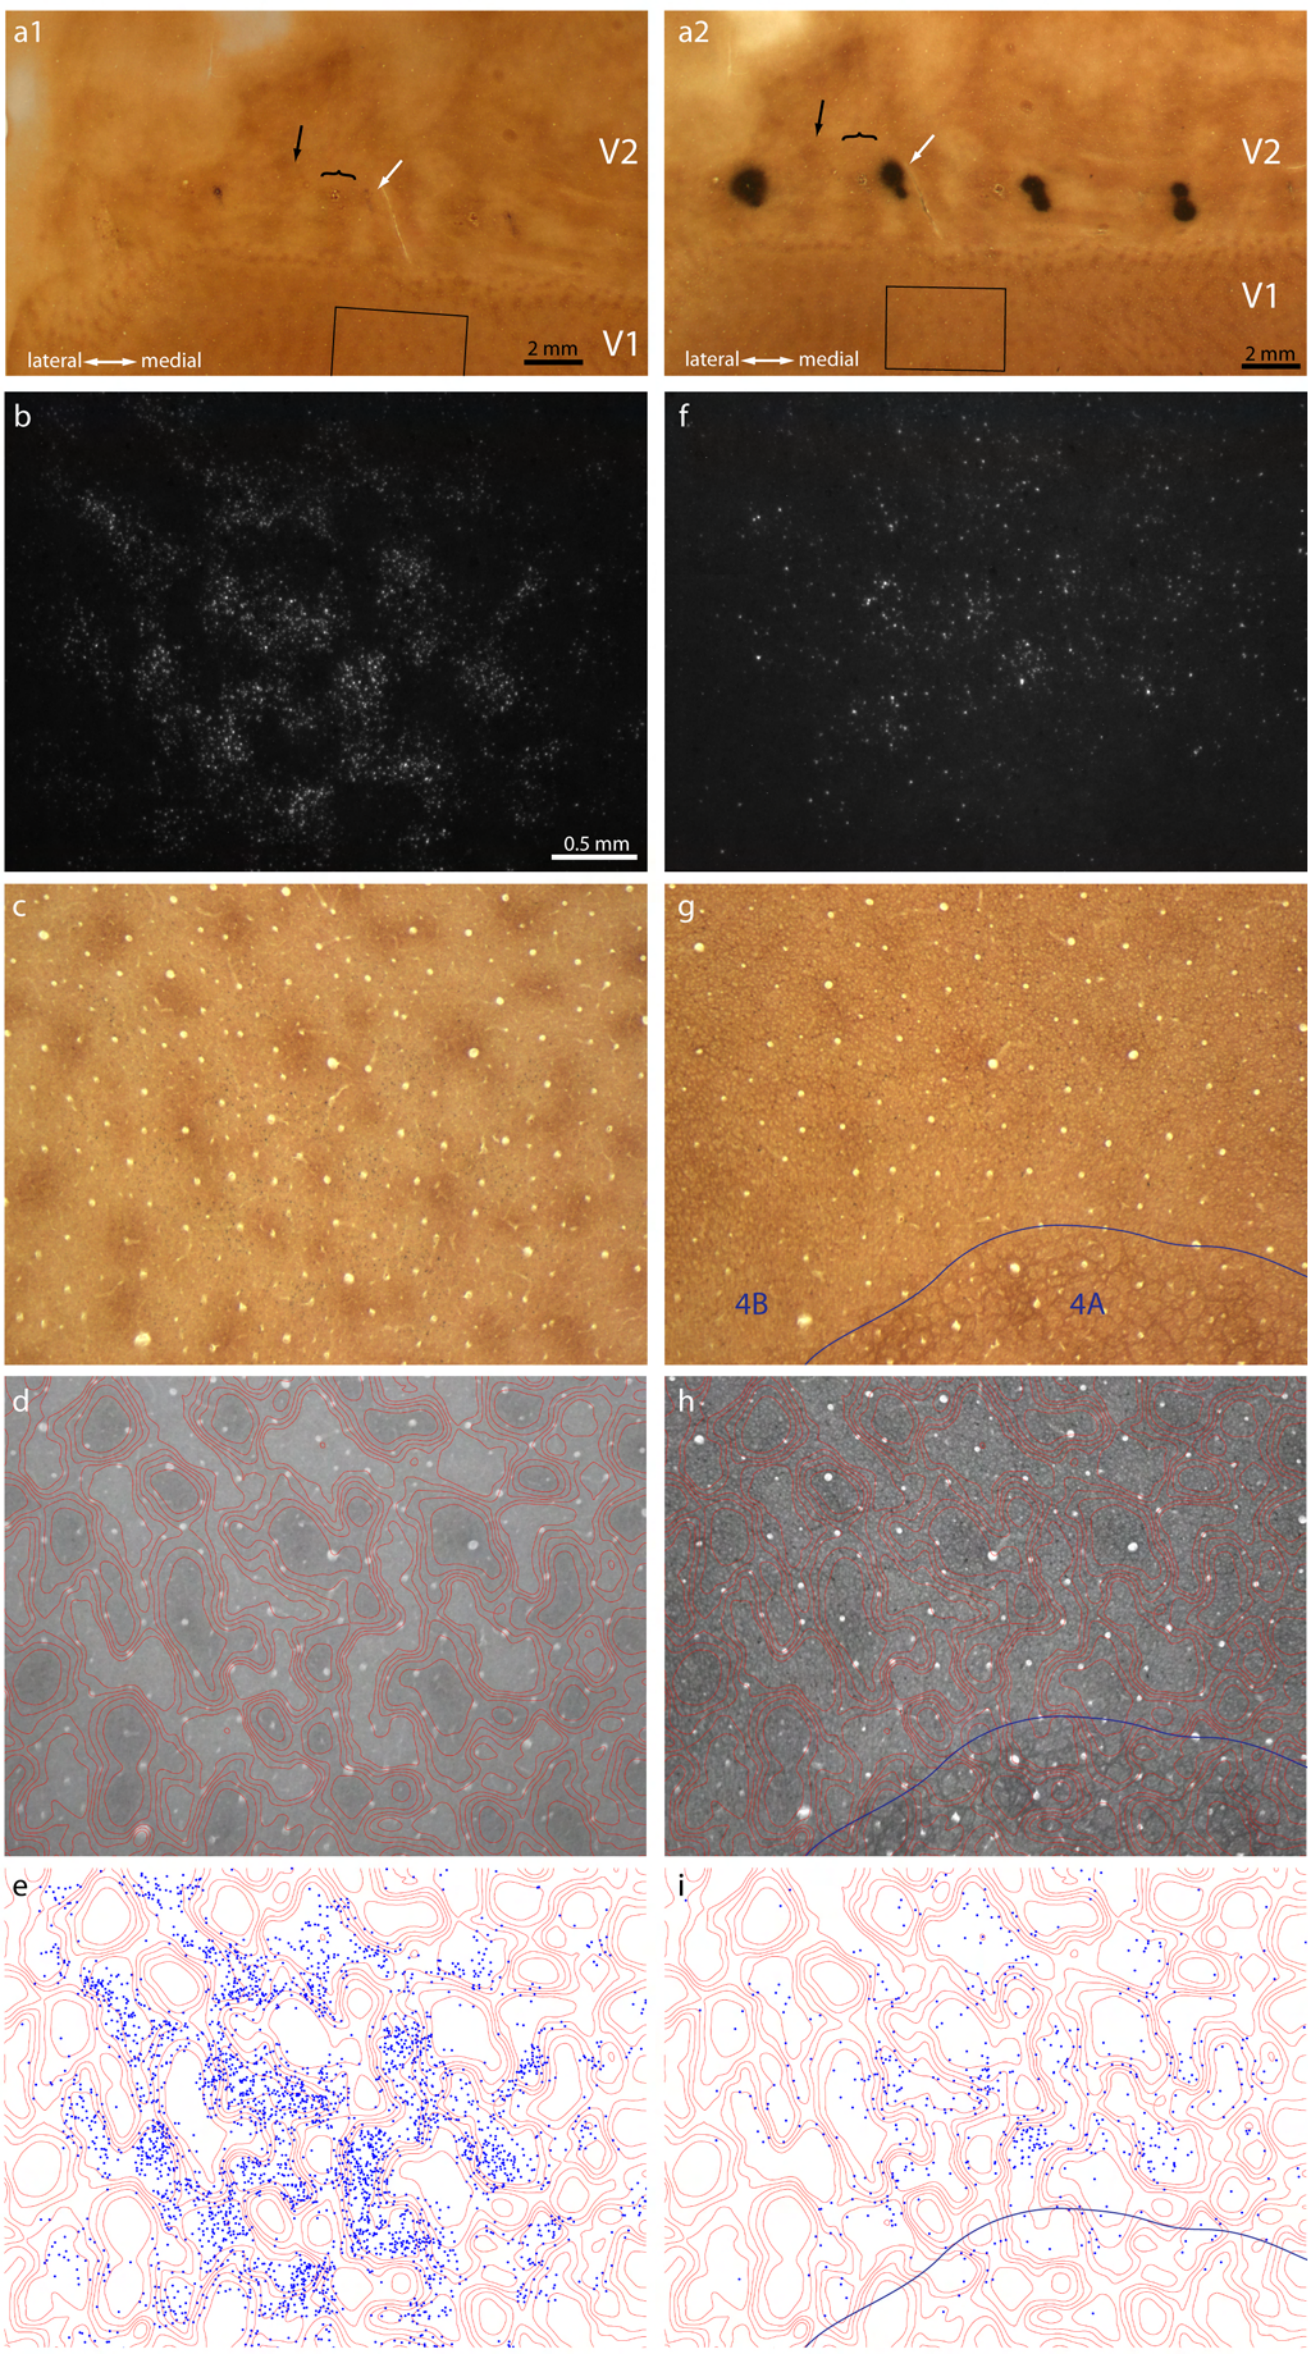

Supplemental Figure 10. Pale stripe injection 14 before silver intensification (a1), and after silver intensification (a2). Cell labeling and CO density plots in layer 2/3 (b-e) and layer 4B (f-i).

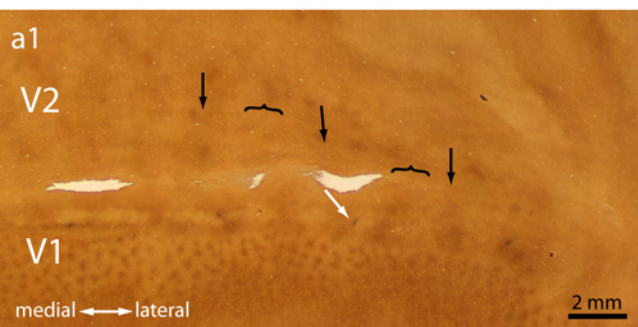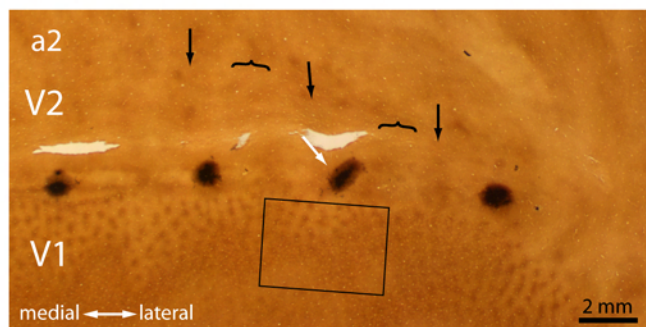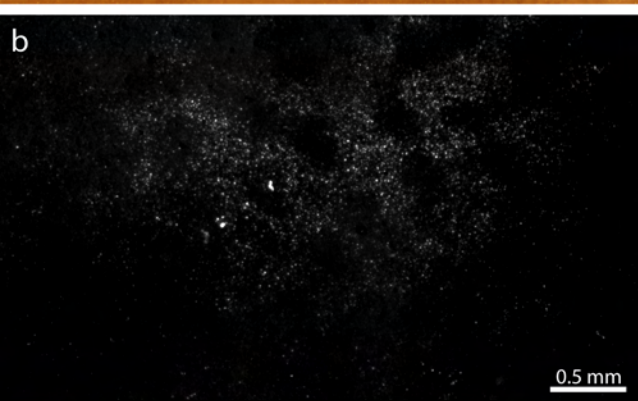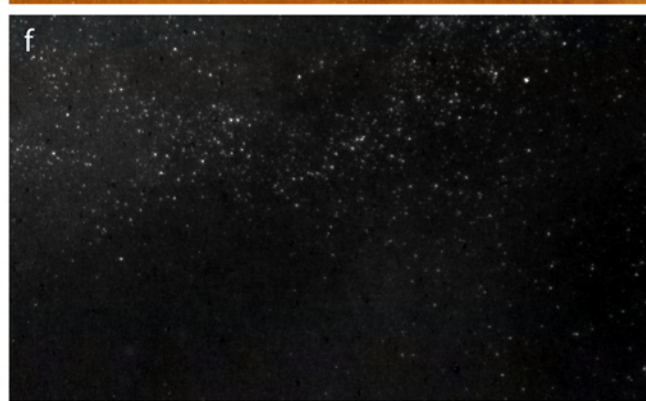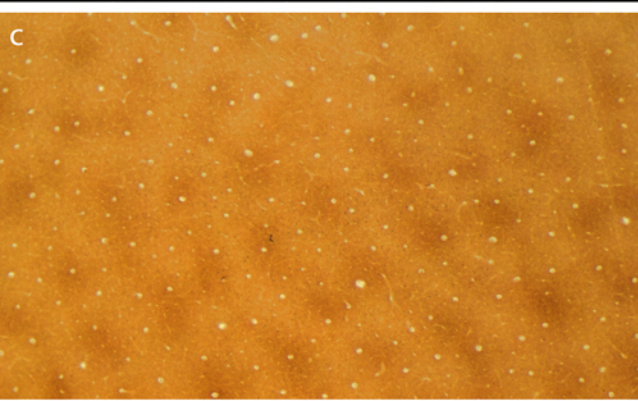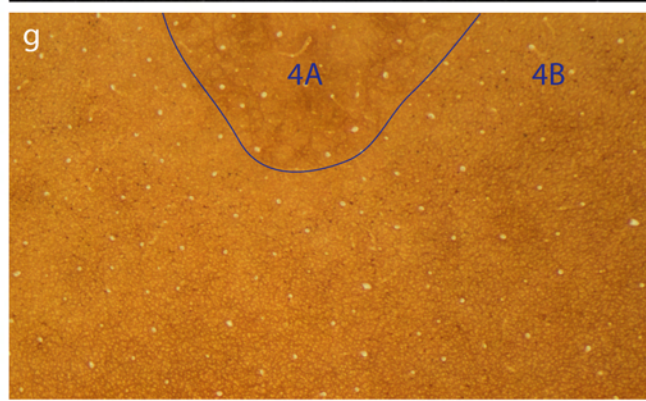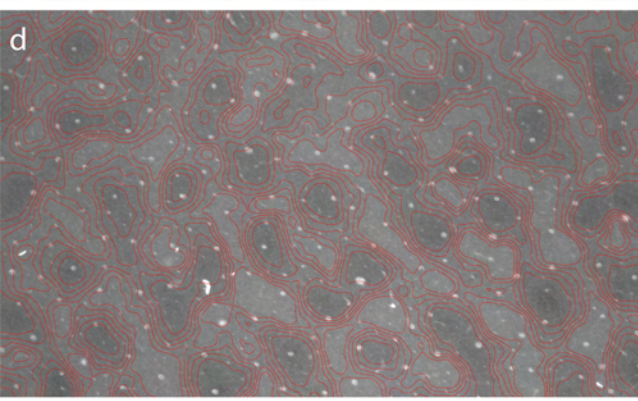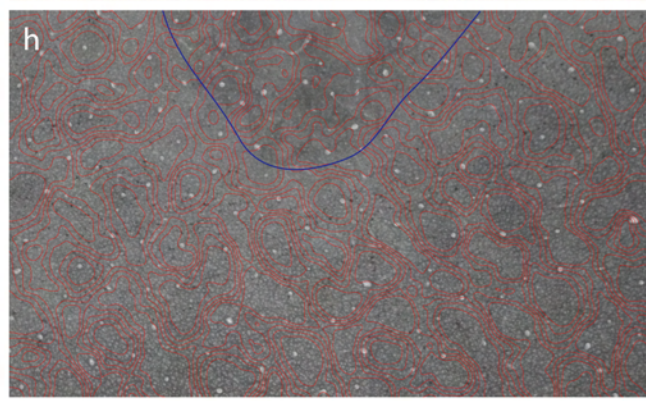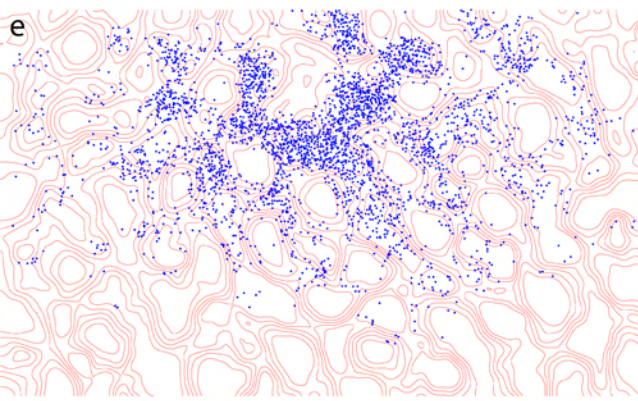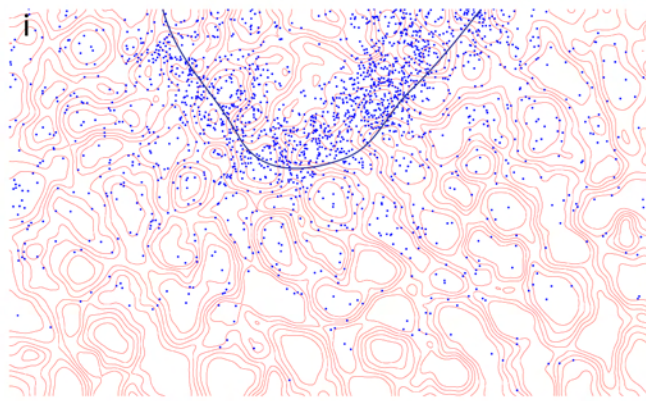

Supplemental Figure 11. Pale stripe injection 15 after silver intensification (a). Cell labeling and CO density plots in layer 2/3 (b-e) and layer 4B (f-i).

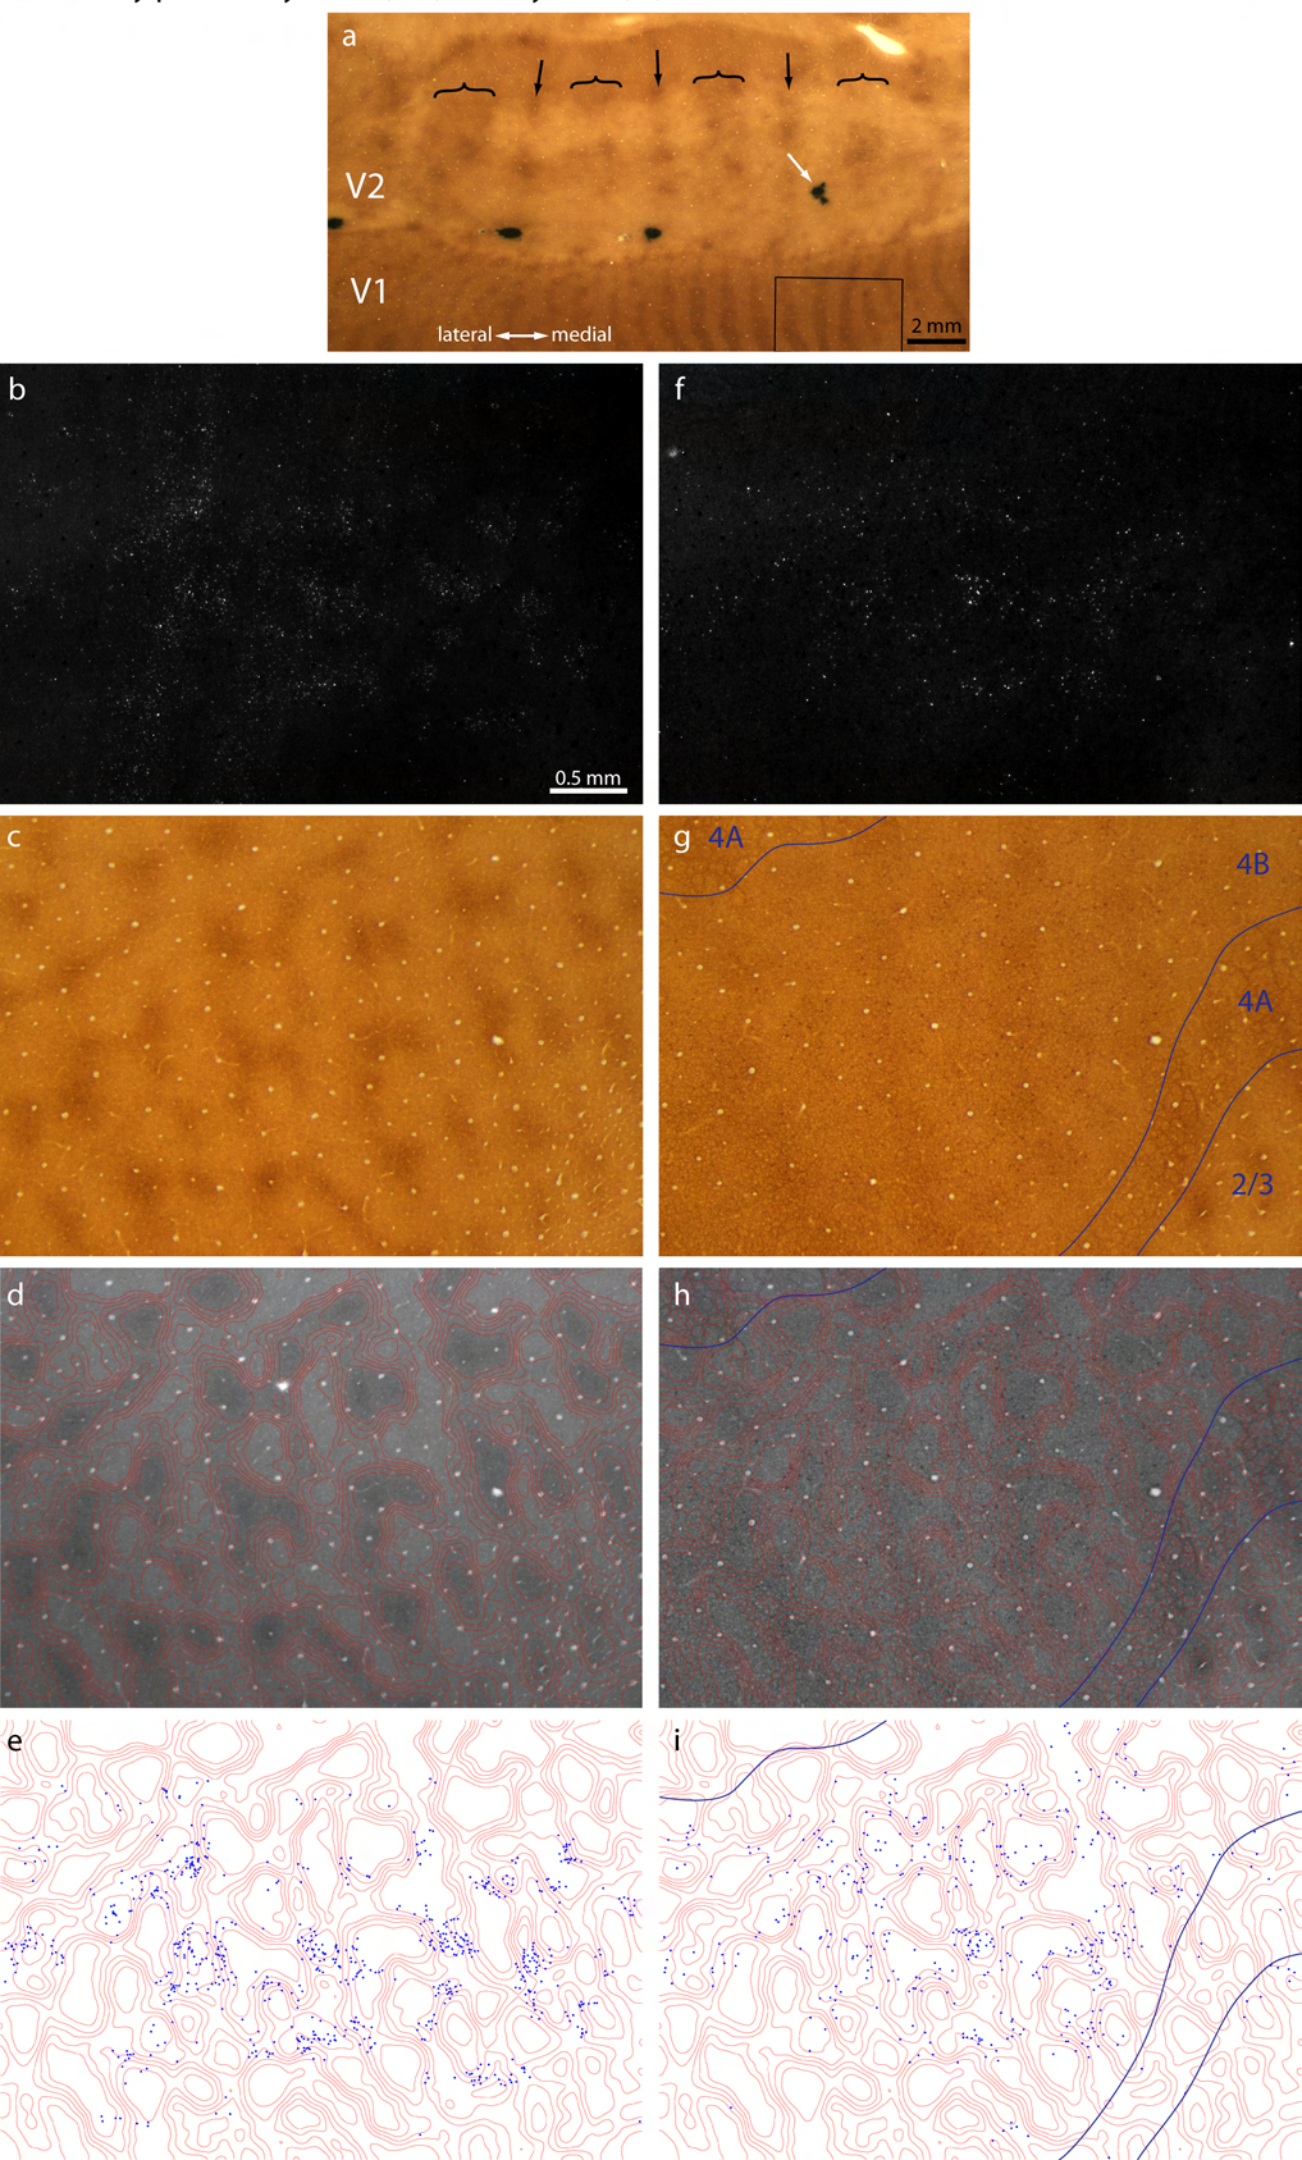

Supplemental Figure 12. Pale stripe injection 16 before silver intensification (a1), and after silver intensification (a2). The dark stripe types are poorly distinguished, but the injection is clearly in a pale stripe. Cell labeling and CO density plots in layer 2/3 (b-e) and layer 4B (f-i).

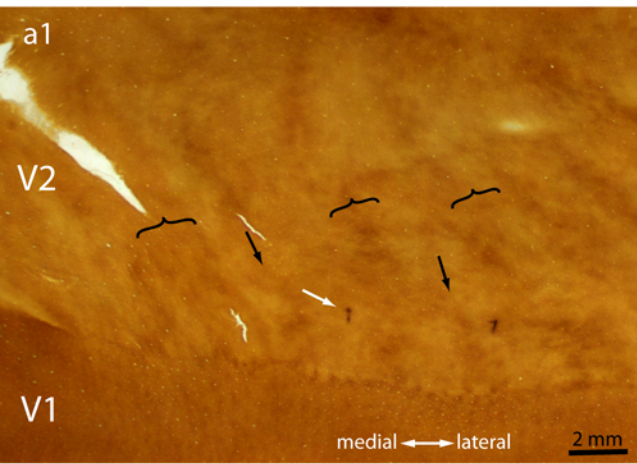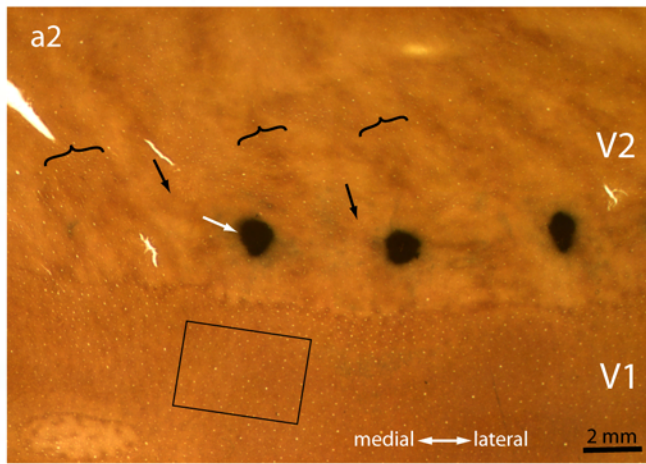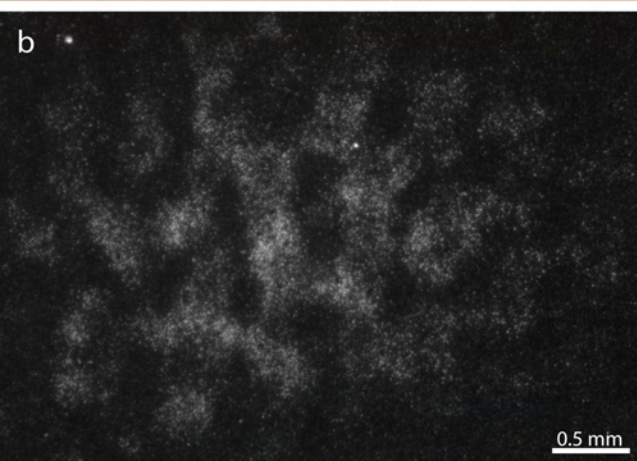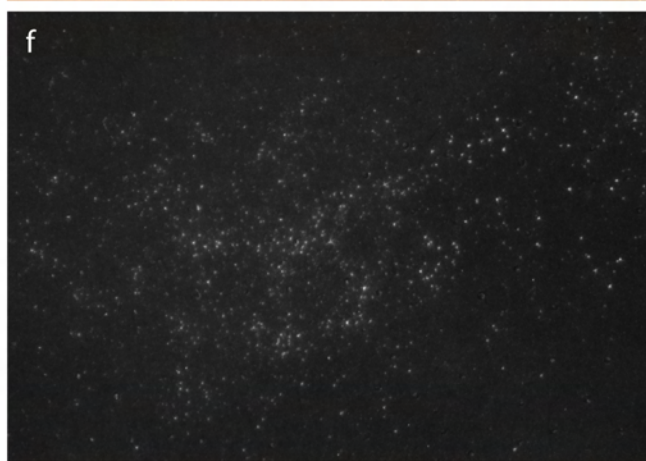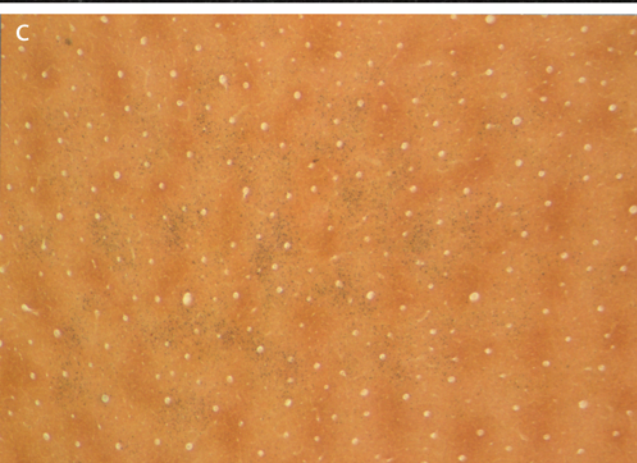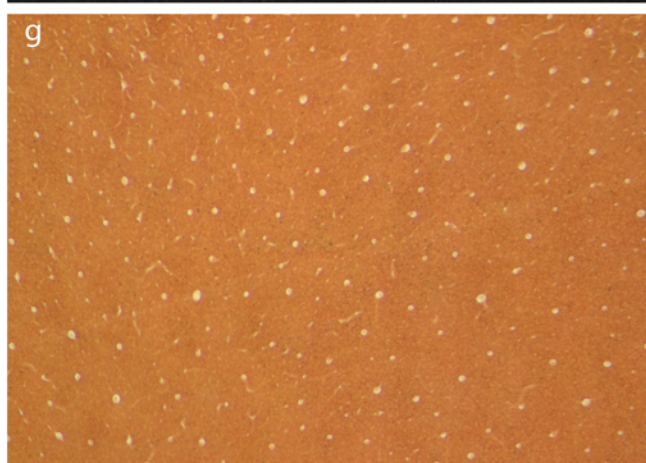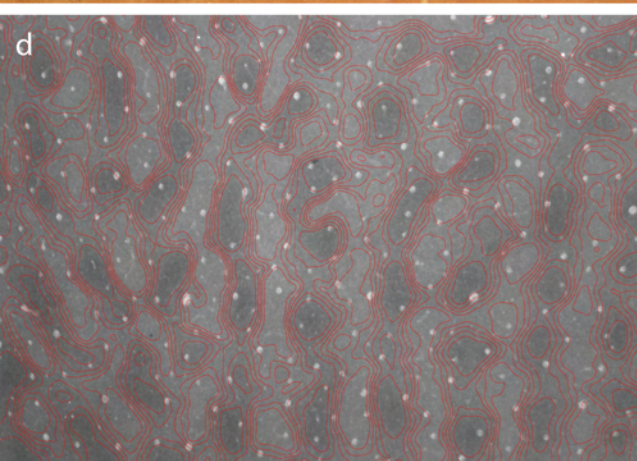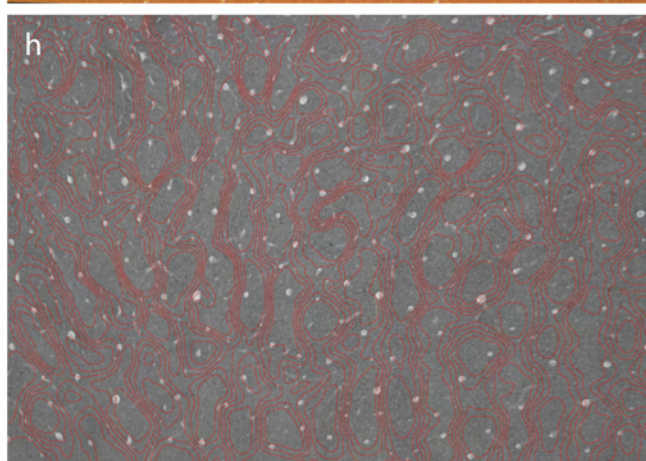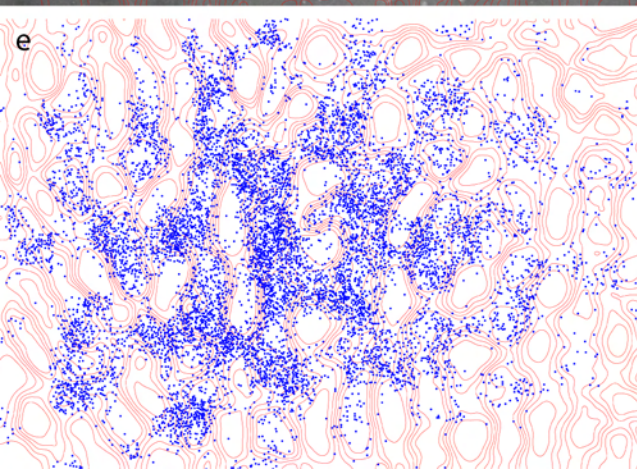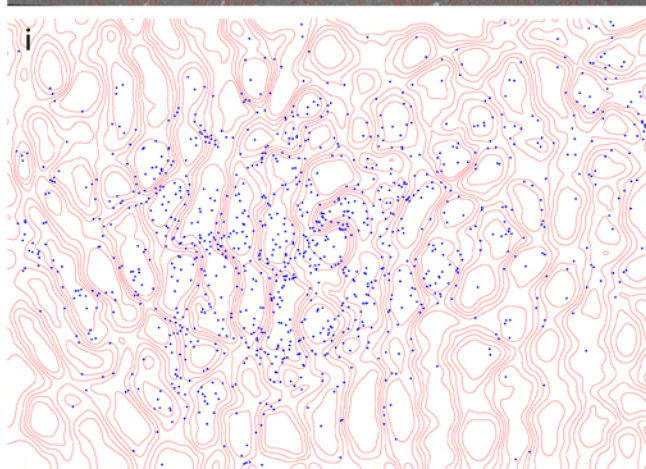

Supplement: NIHMS314314-supplement-Supplementary.pdf [file NIHMS314314-supplement-Supplementary.pdf]
